# Supplementary material for: Controlled Synthesis of Luminescent Xanthene Dyes and Use of Ionic Liquid in Thermochromic Reaction
Source: MDPI journal article supplement (doi:10.3390/molecules27103092), 2022-05-11
Supplement: s1 [file s1]

# Controlled Synthesis of Luminescent Xanthene Dyes and Use of Ionic Liquid in Thermochemical Reaction

Bartłomiej Potaniec<sup>1,†</sup>, Maria Zdończyk<sup>1,2,†</sup> and Joanna Cybińska<sup>1,2,\*</sup>

<sup>1</sup> Advanced Materials Synthesis Group, Materials Science & Engineering Center, Łukasiewicz Research Network—PORT Polish Center for Technology Development, Stabłowska 147 Street, 54-066 Wrocław, Poland; bartlomiej.potaniec@port.lukasiewicz.gov.pl;

<sup>2</sup> Faculty of Chemistry, University of Wrocław, F. Joliot-Curie 14 Street, 50-383 Wrocław, Poland; maria.zdonczyk@chem.uni.wroc.pl

\* Correspondence: joanna.cybinska@chem.uni.wroc.pl or joanna.cybinska@port.lukasiewicz.gov.pl

† These authors contributed equally to this work.

## S1. Spectroscopic characterization

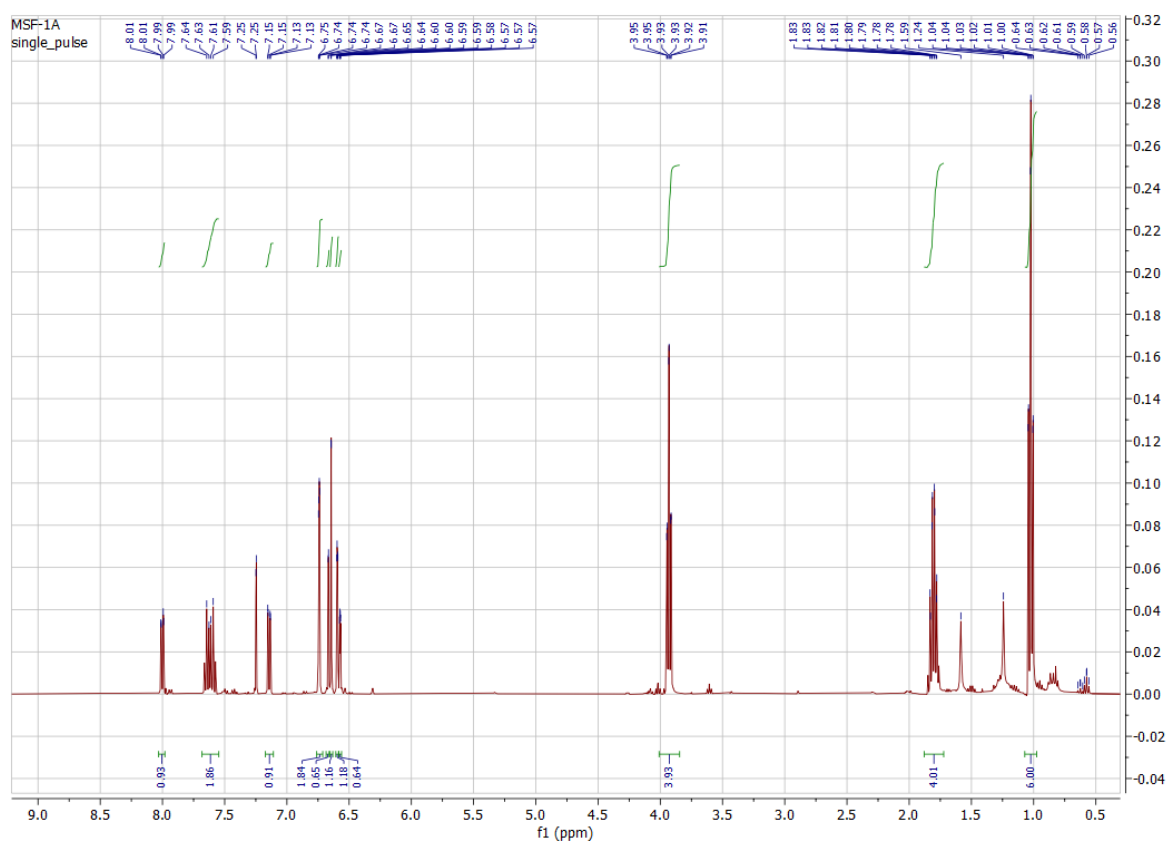

**Figure S1.** <sup>1</sup>H-NMR (600 MHz, chloroform-*d*) spectrum of product **1A**.

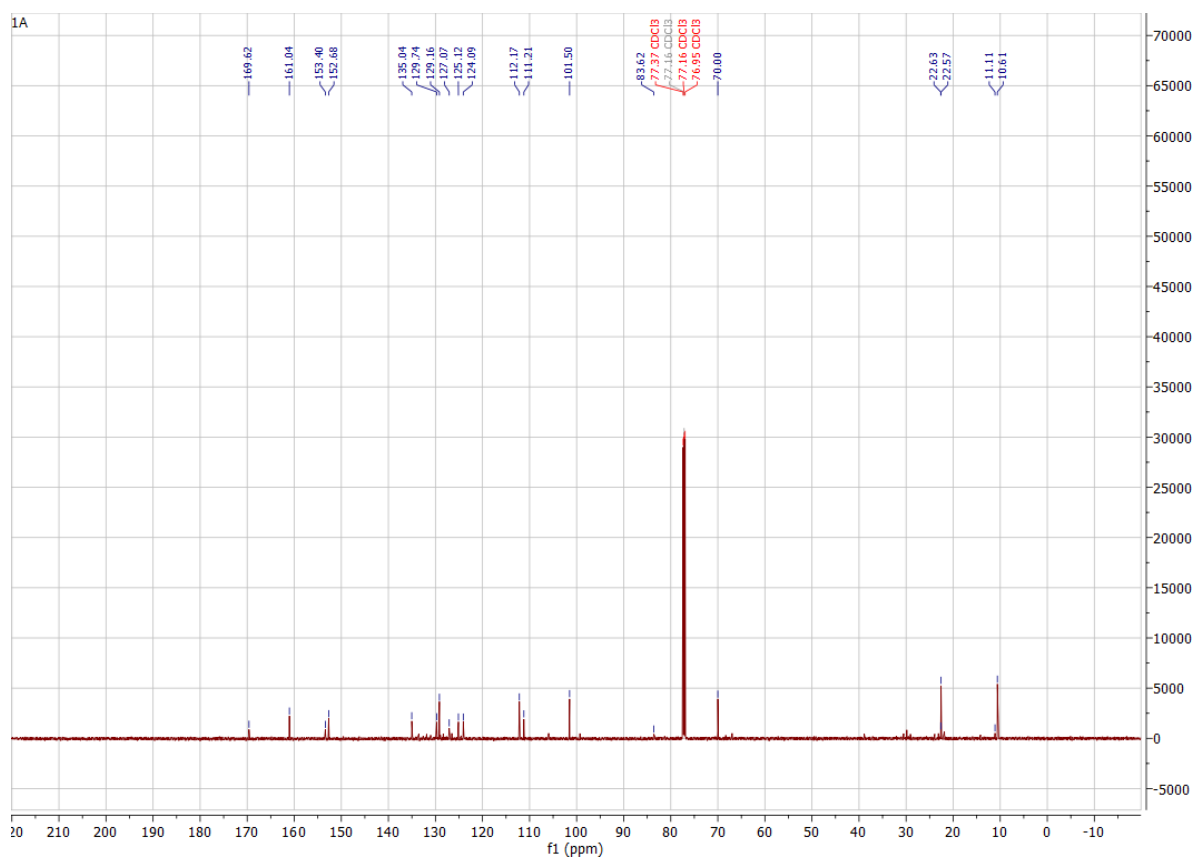

**Figure S2.**  $^{13}\text{C}$ -NMR (151 MHz, chloroform- $d$ ) spectrum of product **1A**.

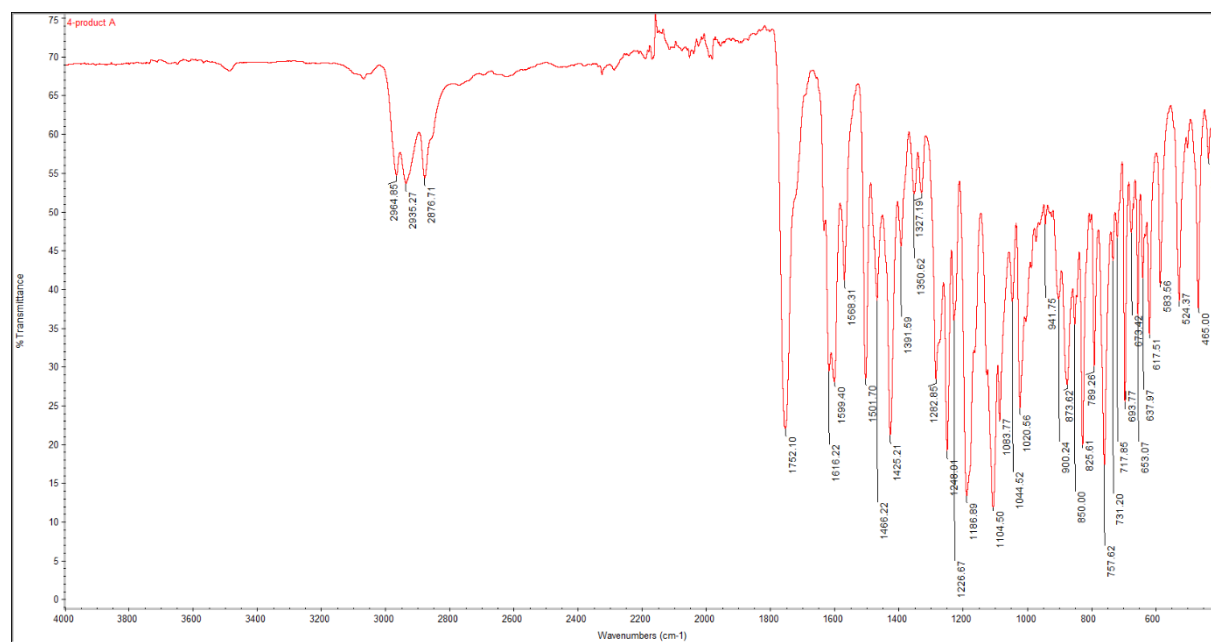

**Figure S3.** FTIR-ATR spectrum of product **1A**.

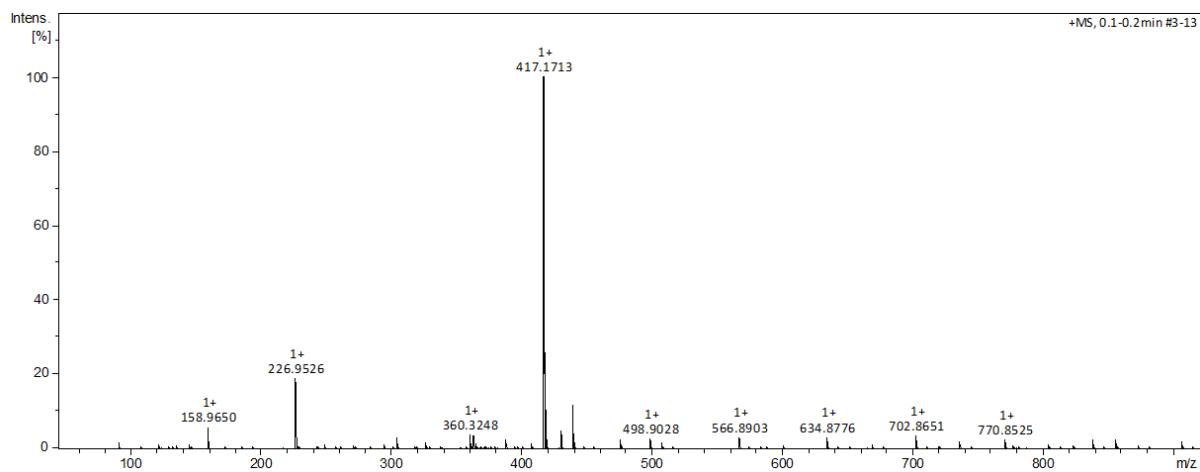

**Figure S4.** HR ESI-MS spectrum of product **1A**.

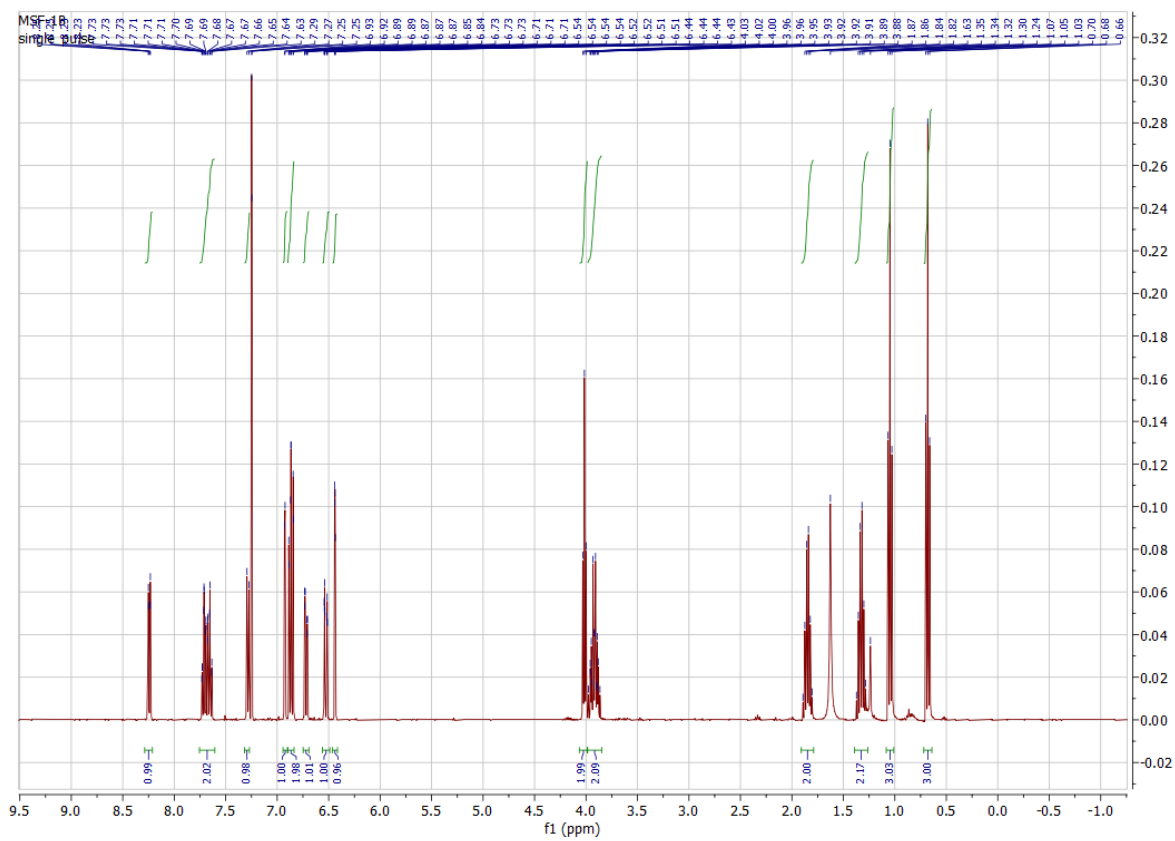

**Figure S5.** <sup>1</sup>H-NMR (600 MHz, chloroform-*d*) spectrum of product **1B**.

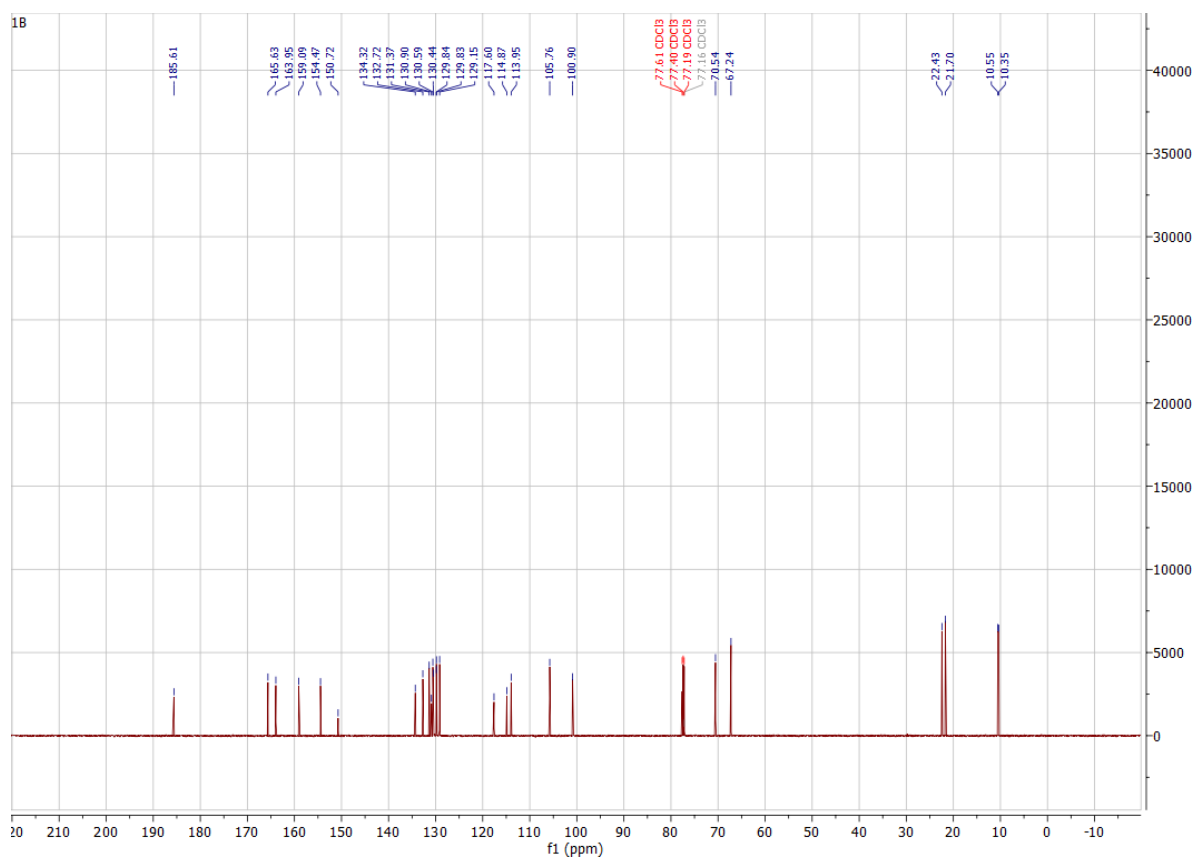

**Figure S6.**  $^{13}\text{C}$ -NMR (151 MHz, chloroform- $d$ ) spectrum of product **1B**.

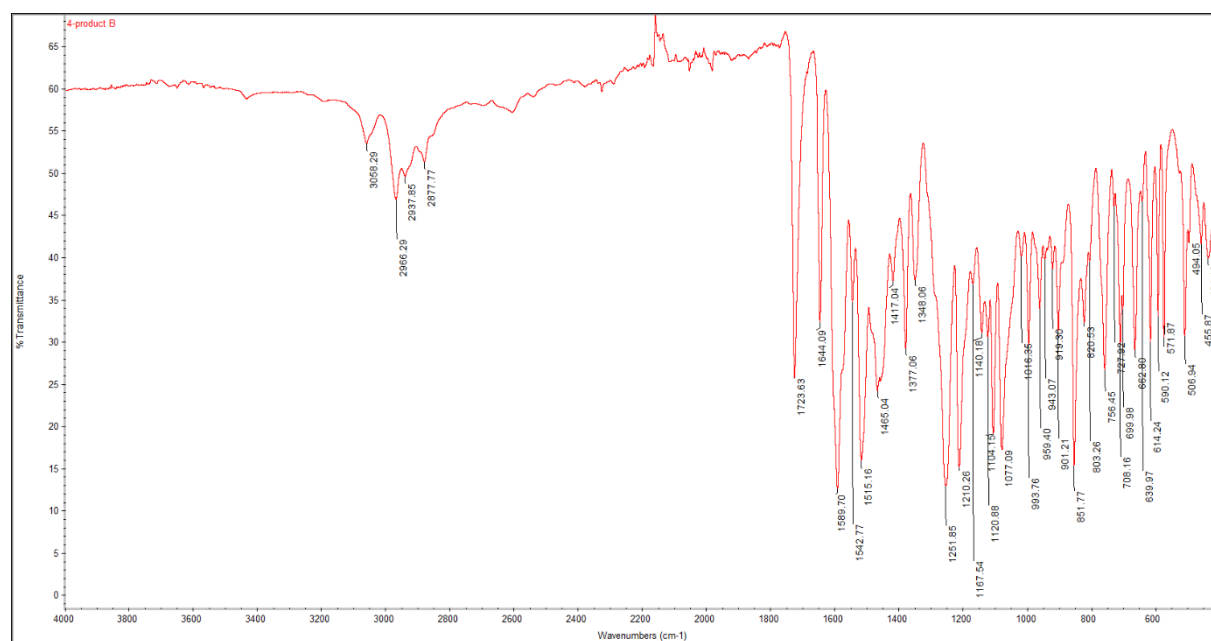

**Figure S7.** FTIR-ATR spectrum of product **1B**.

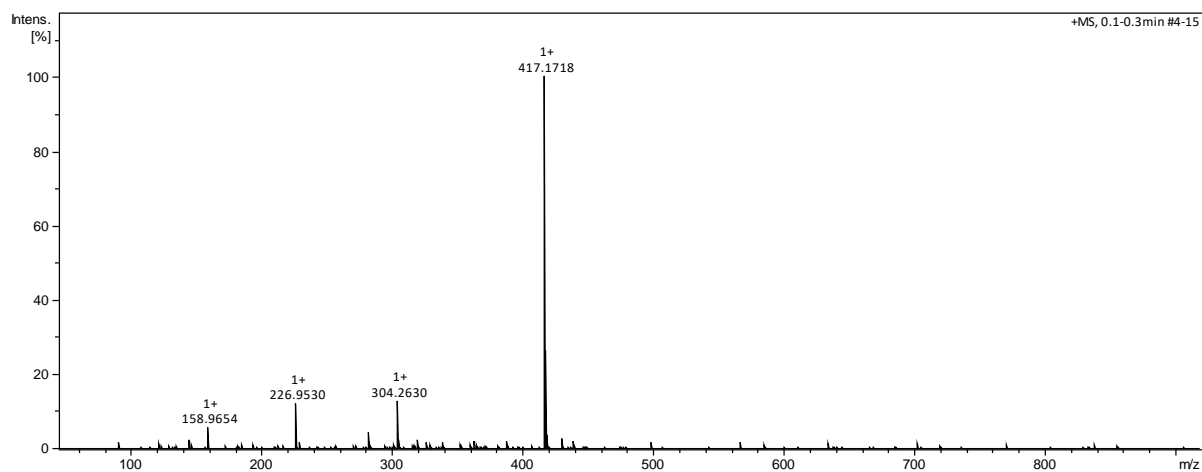

**Figure S8.** HR ESI-MS spectrum of product **1B**.

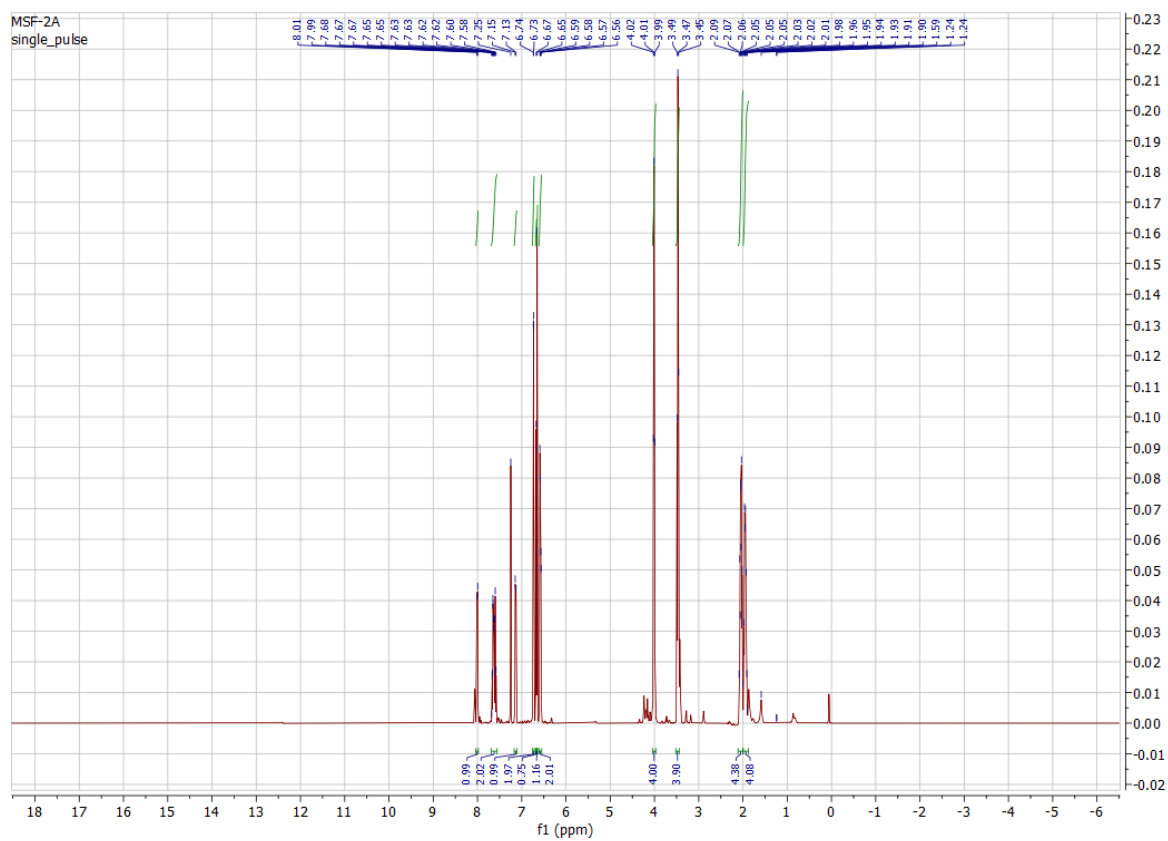

**Figure S9.**  $^1\text{H}$ -NMR (600 MHz,  $\text{CDCl}_3$ ) spectrum of product **2A**.

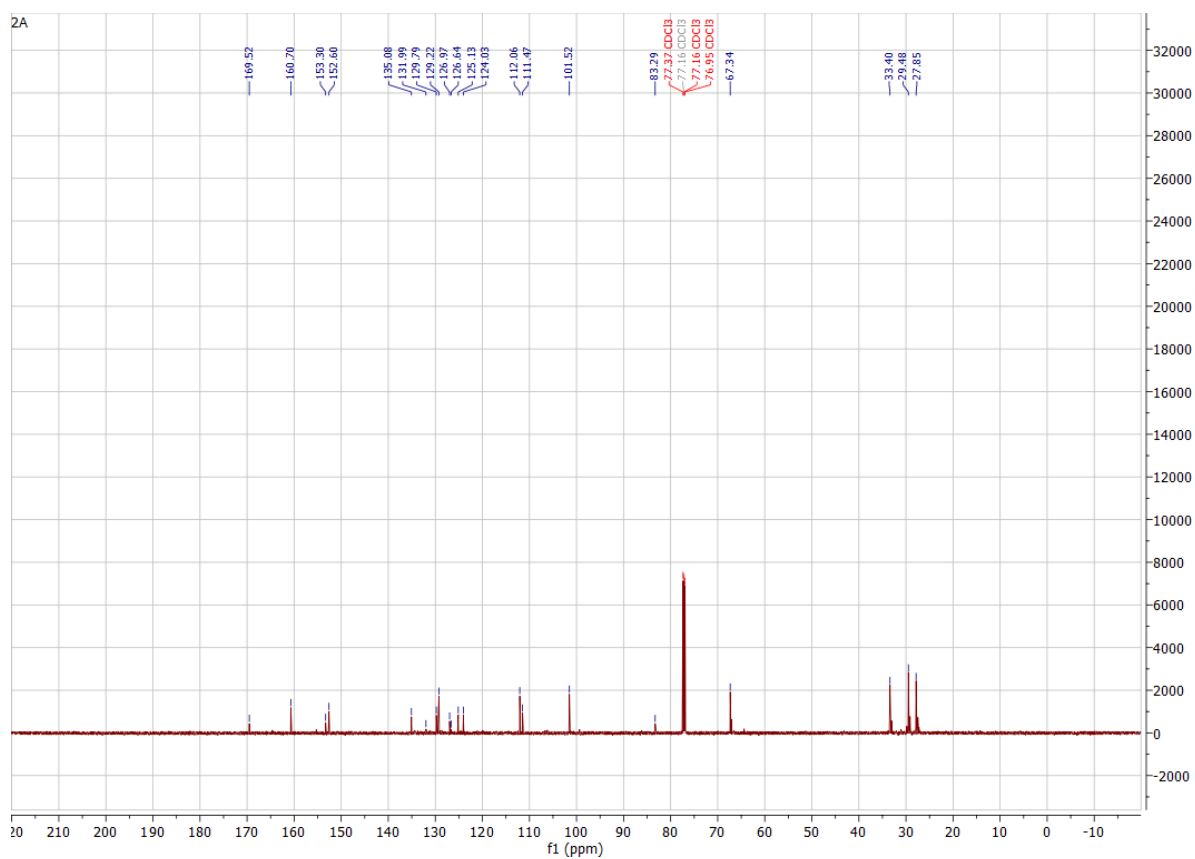

**Figure S10.**  $^{13}\text{C}$ -NMR (151 MHz, chloroform-*d*) spectrum of product **2A**.

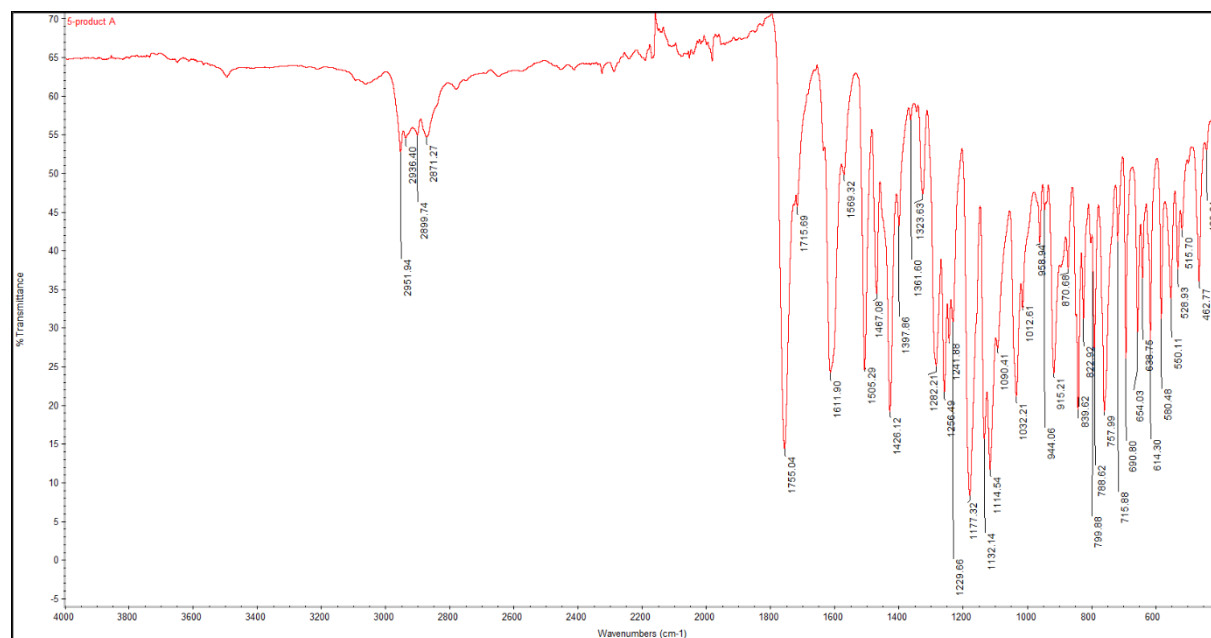

**Figure S11.** FTIR-ATR spectrum of product **2A**.

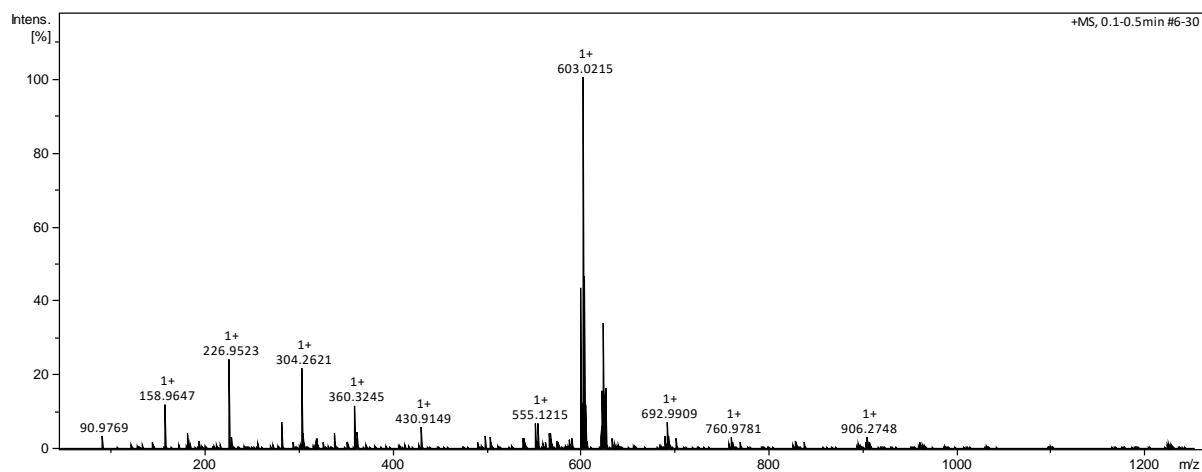

**Figure S12.** HR ESI-MS spectrum of product 2A.

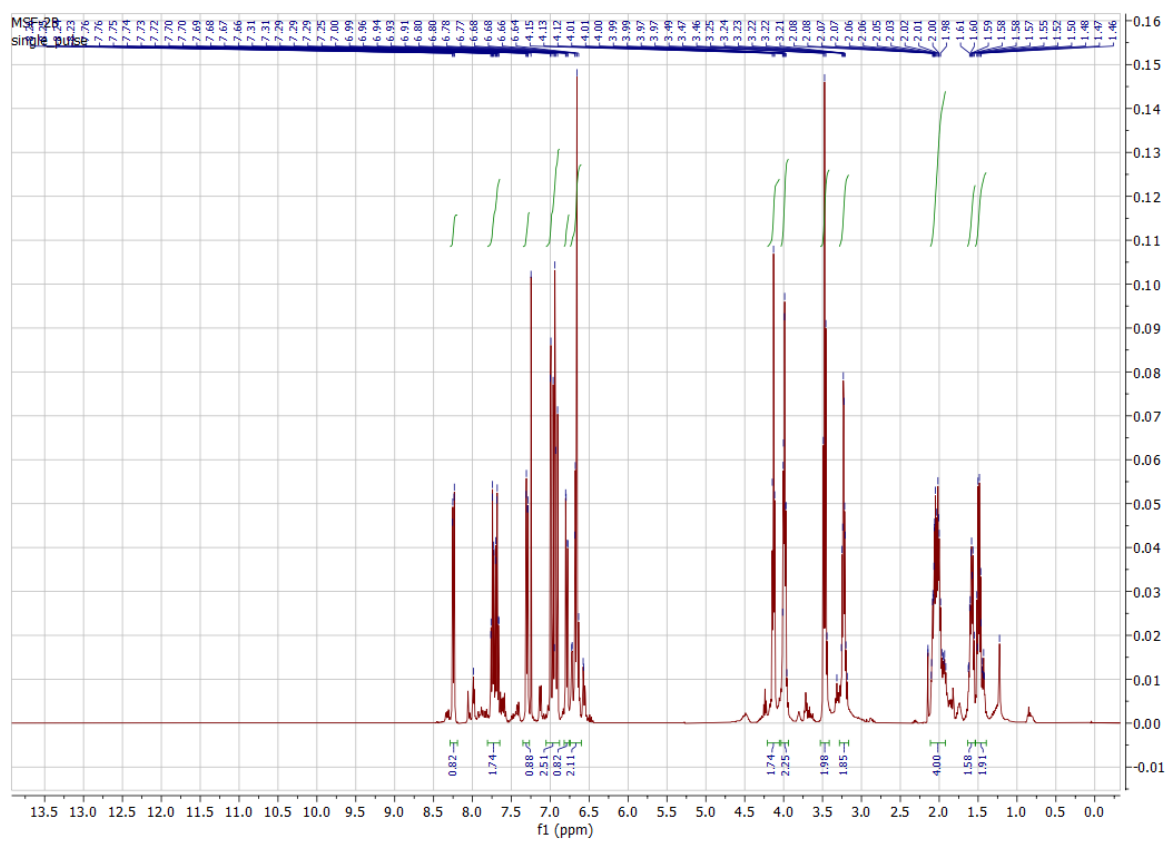

**Figure S13.** <sup>1</sup>H-NMR (600 MHz, chloroform-*d*) spectrum of product 2B.

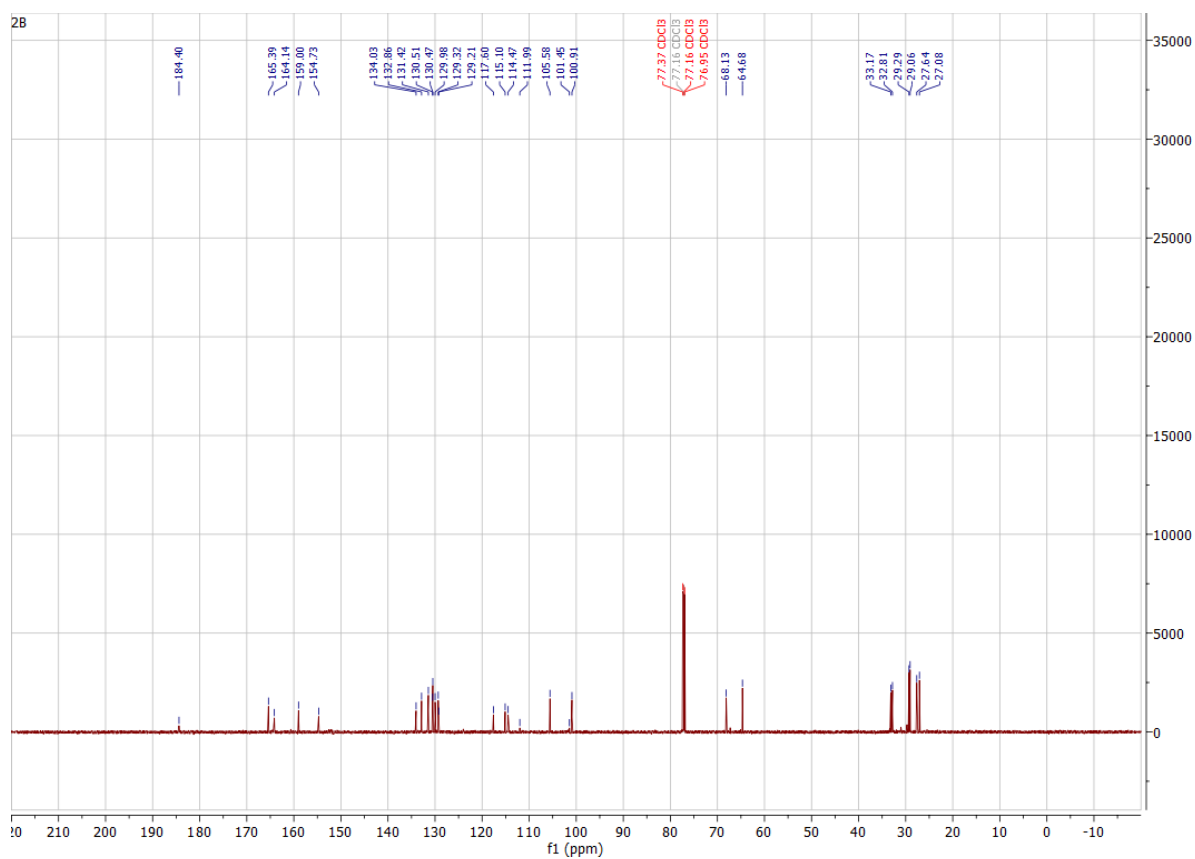

**Figure S14.**  $^{13}\text{C}$ -NMR (151 MHz, chloroform- $d$ ) spectrum of product **2B**.

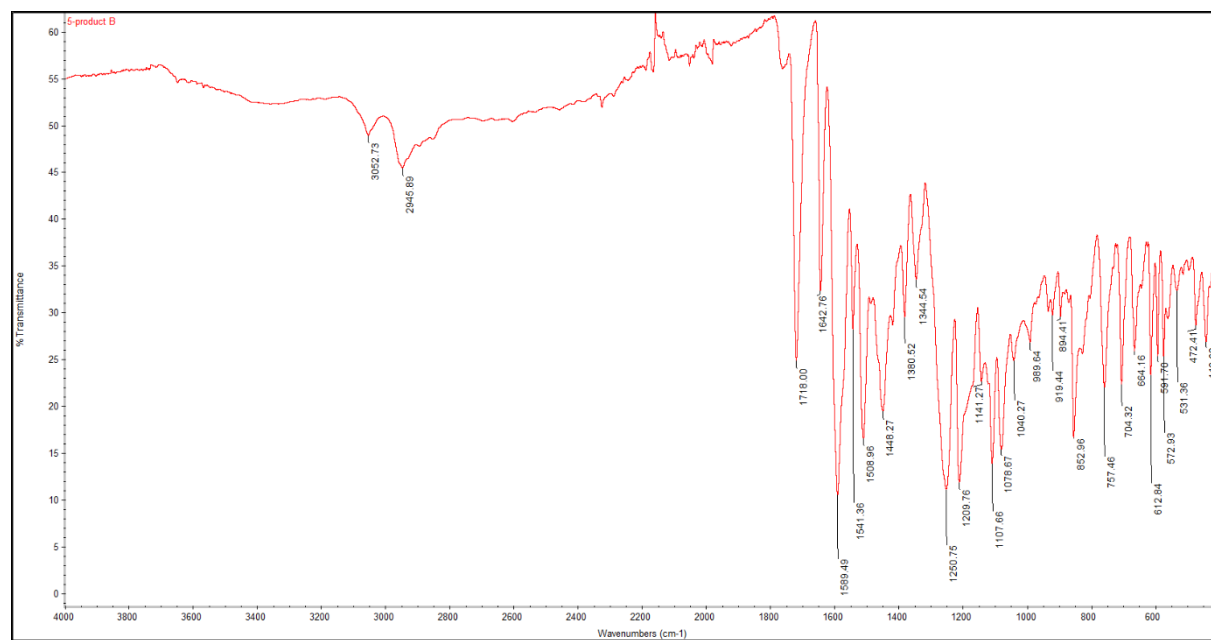

**Figure S15.** FTIR-ATR spectrum of product **2B**.



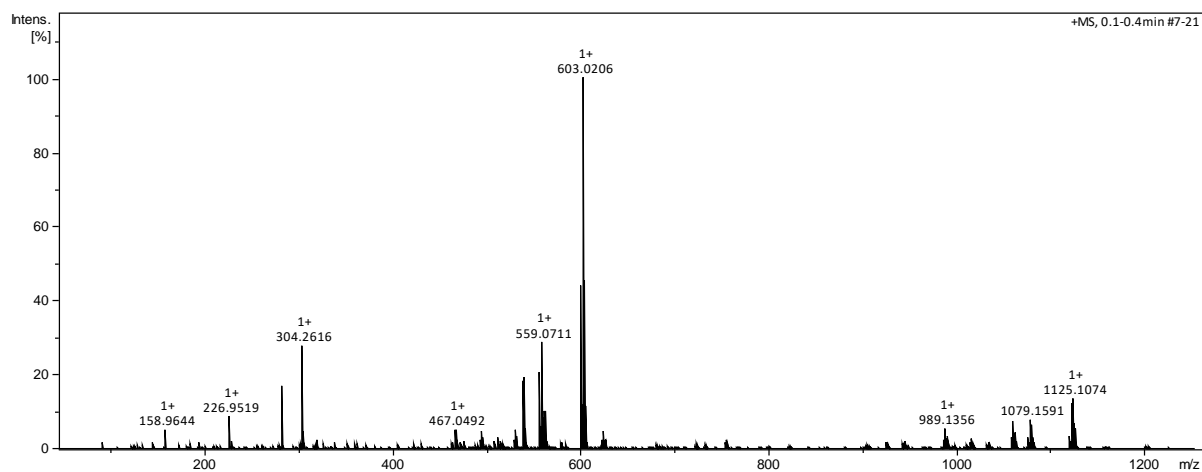

**Figure S16.** HR ESI-MS spectrum of product **2B**.

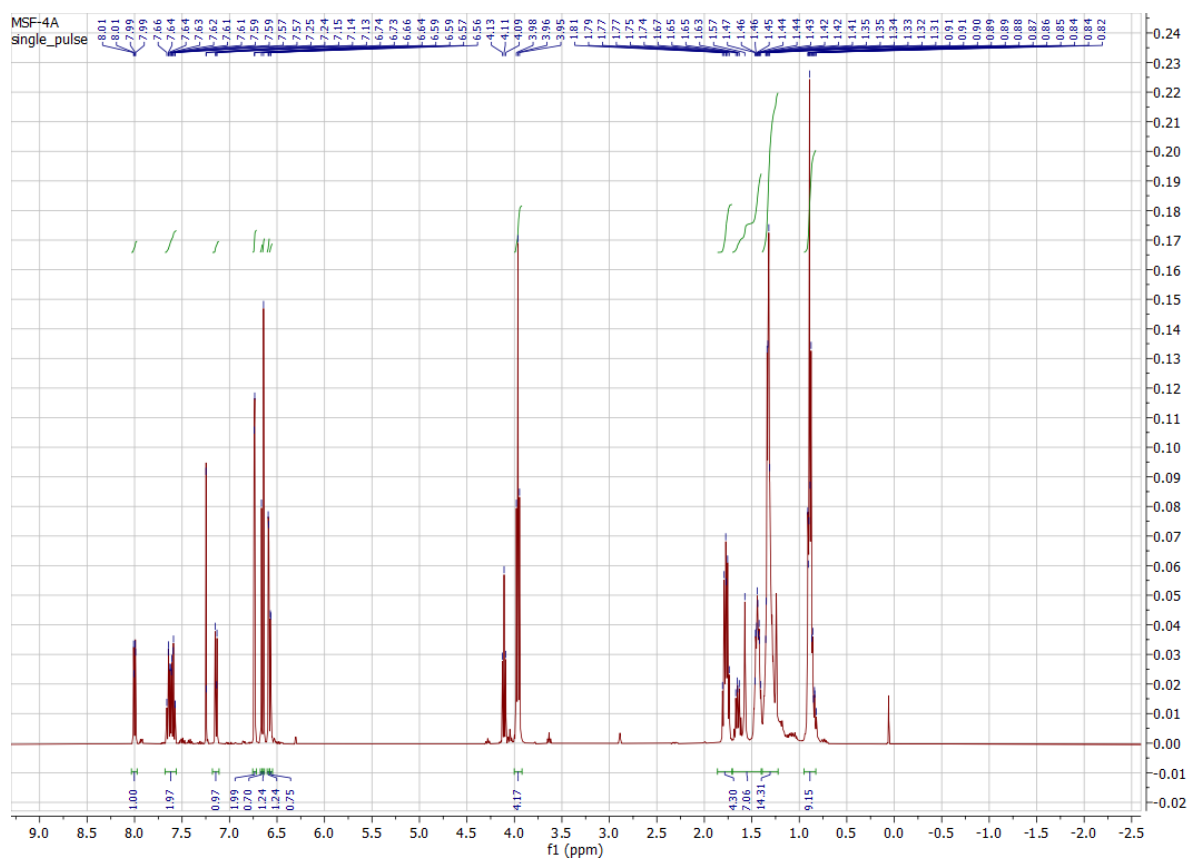

**Figure S17.**  $^1\text{H}$ -NMR (600 MHz,  $\text{CDCl}_3$ ) spectrum of product **3A**.

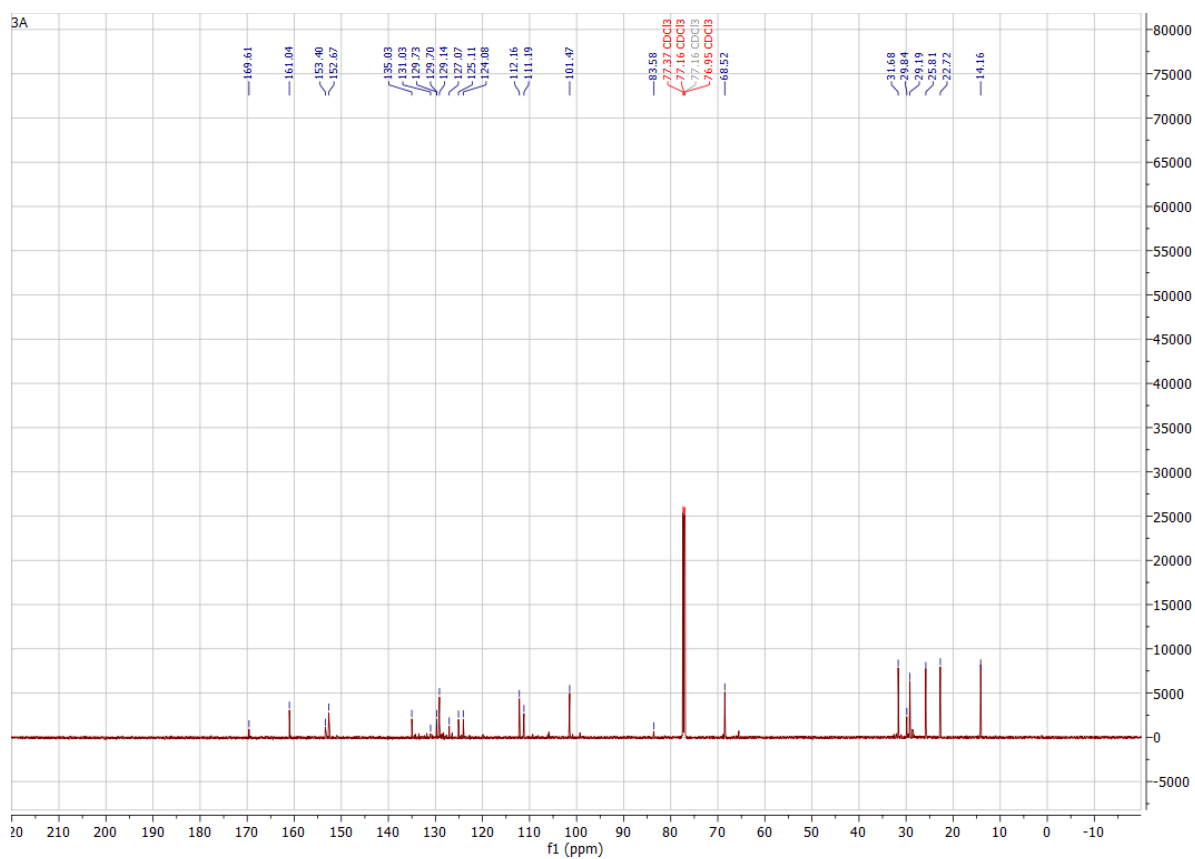

**Figure S18.**  $^{13}\text{C}$ -NMR (151 MHz, chloroform-*d*) spectrum of product **3A**.

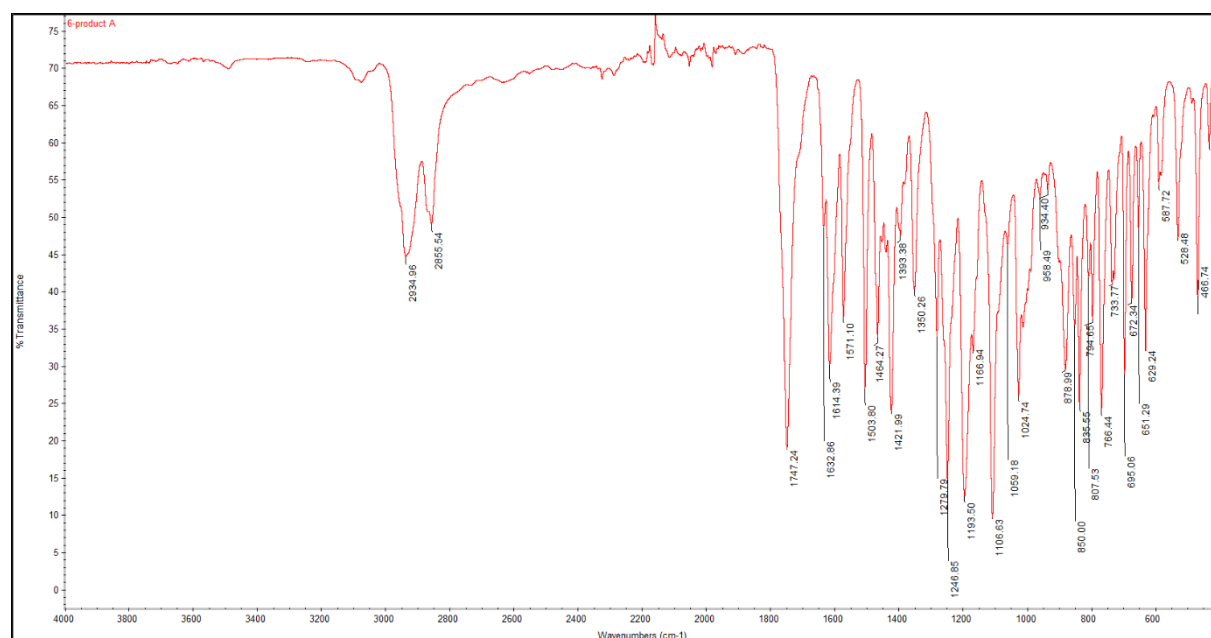

**Figure S19.** FTIR-ATR spectrum of product **3A**.

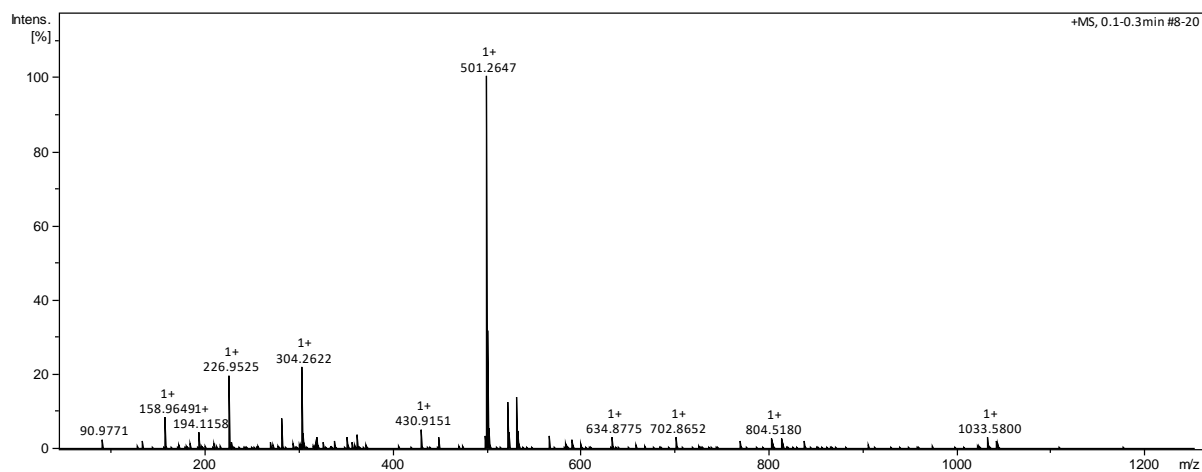

**Figure S20.** HR ESI-MS spectrum of product **3A**.

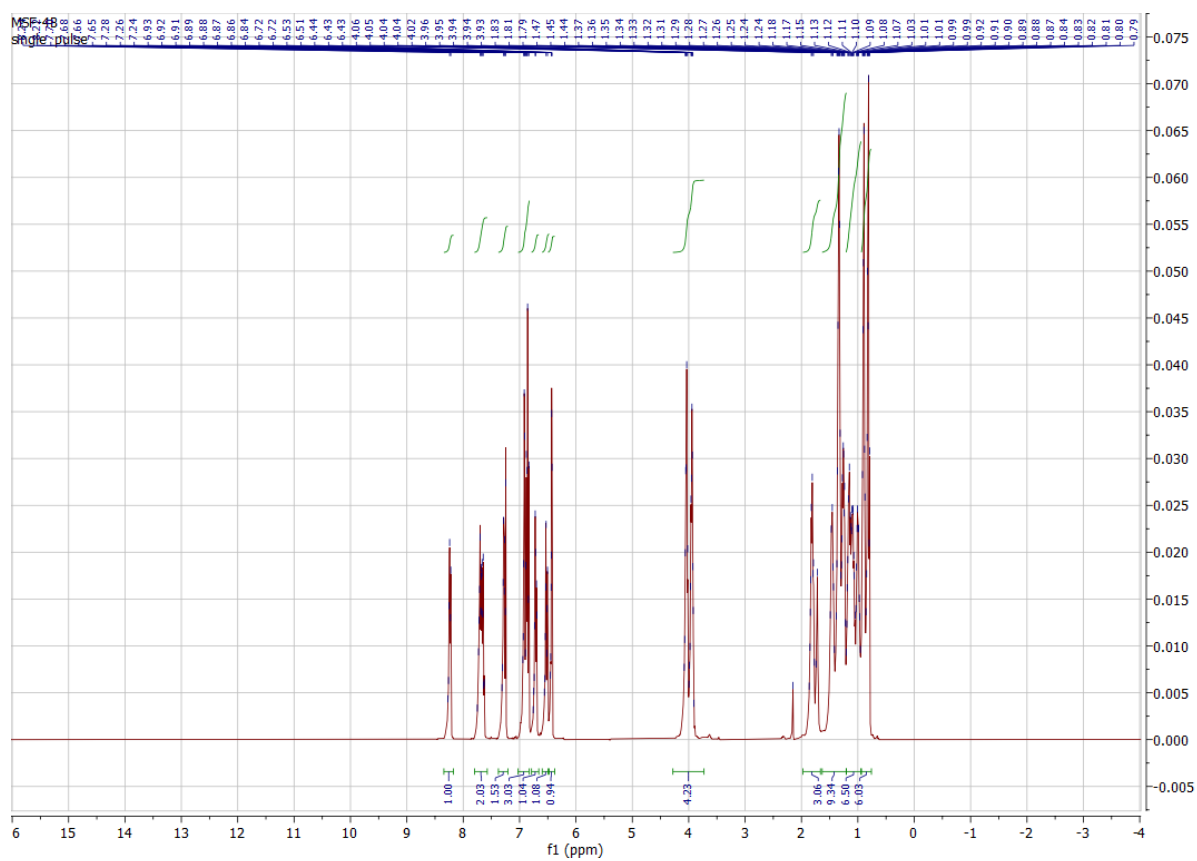

**Figure S21.**  $^1\text{H}$ -NMR (600 MHz,  $\text{CDCl}_3$ ) spectrum of product **3B**.

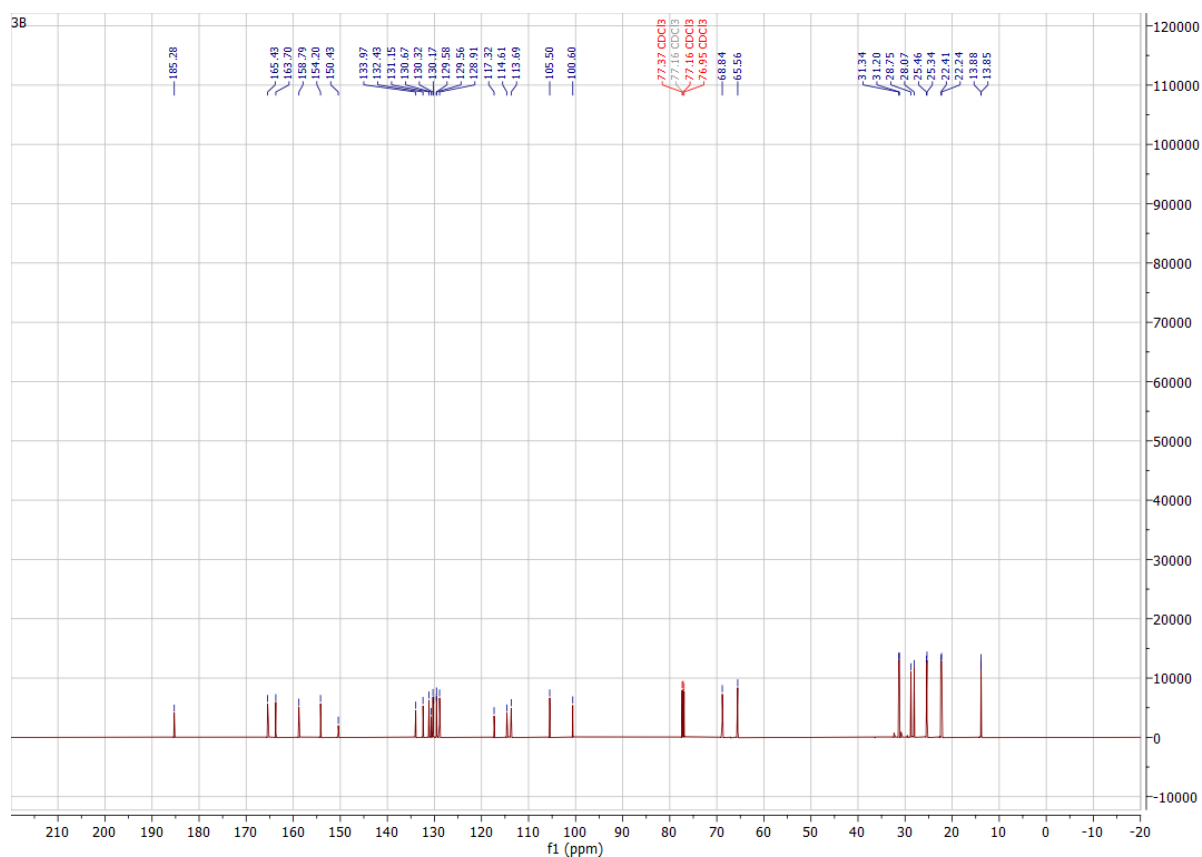

Figure S22.  $^{13}\text{C}$ -NMR (151 MHz, chloroform- $d$ ) spectrum of product **3B**.

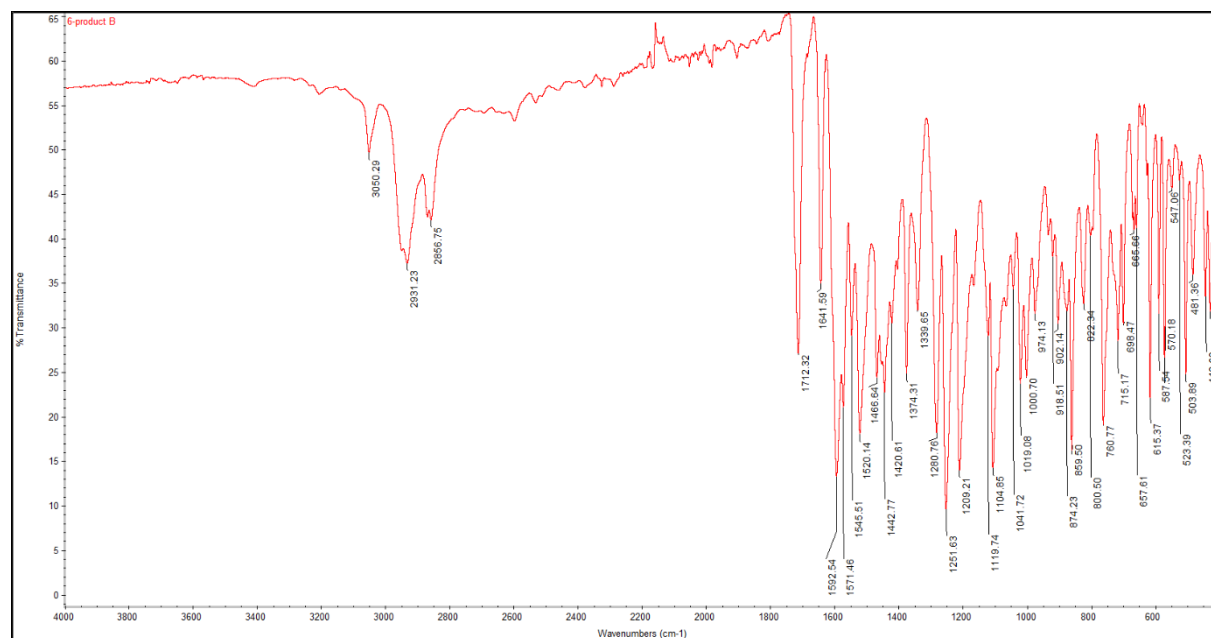

Figure S23. FTIR-ATR spectrum of product **3B**.

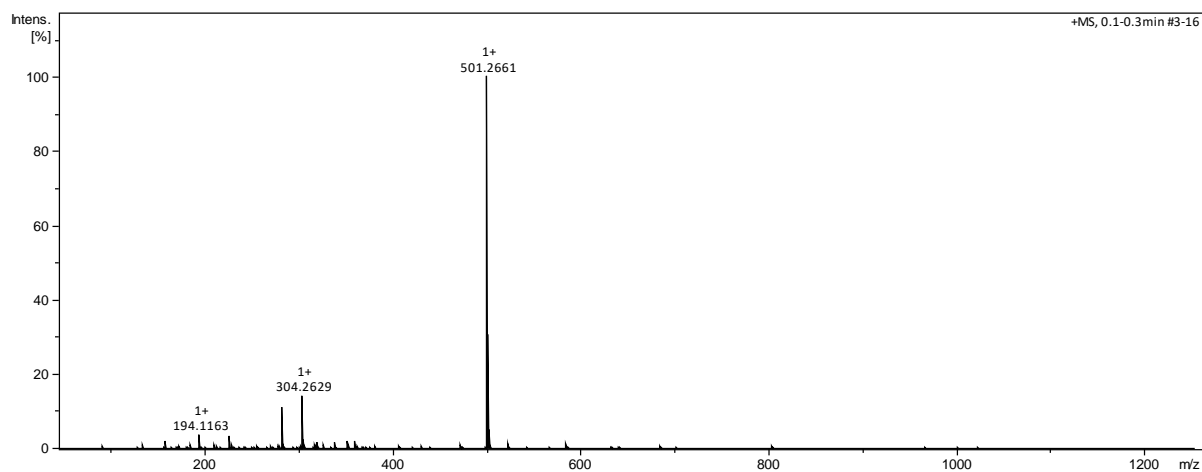

**Figure S24.** HR ESI-MS spectrum of product **3B**.

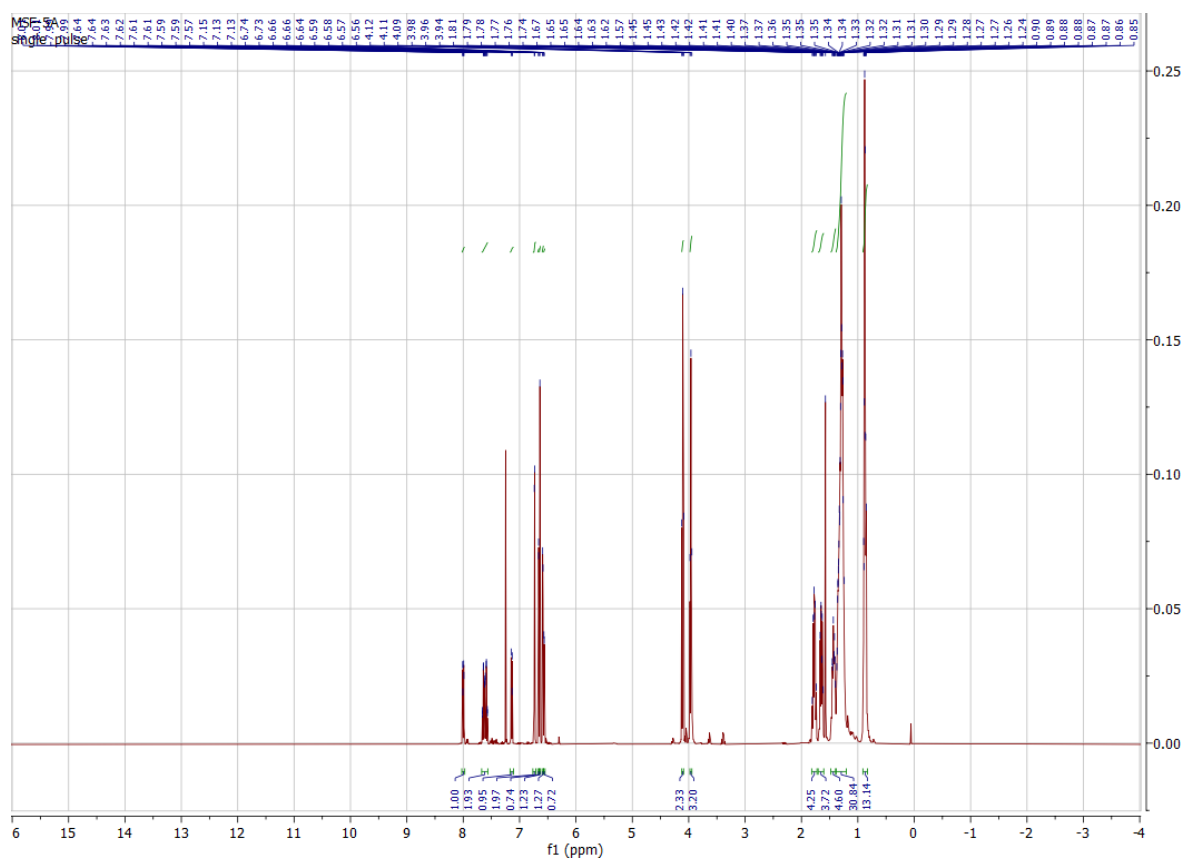

**Figure S25.**  $^1\text{H}$ -NMR (600 MHz,  $\text{CDCl}_3$ ) spectrum of product **4A**.

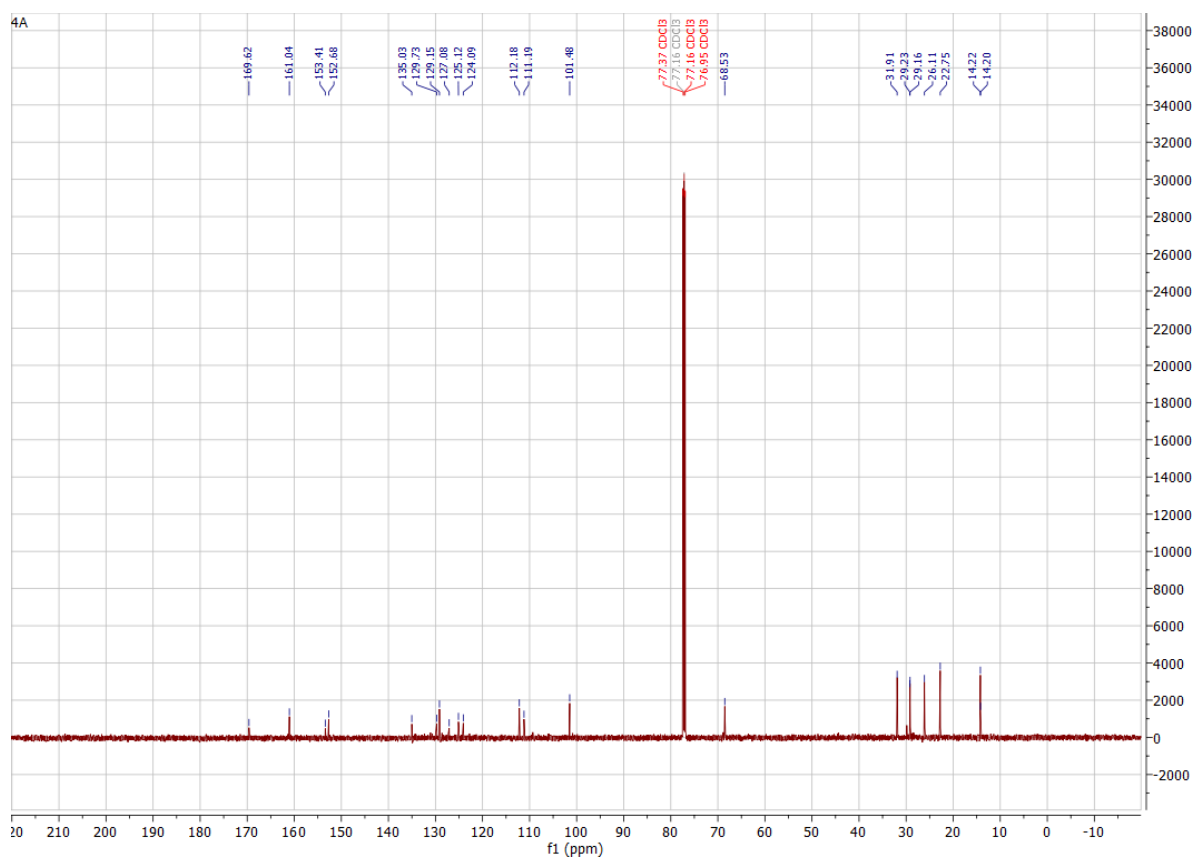

**Figure S26.  $^{13}\text{C}$ -NMR (151 MHz, chloroform- $d$ ) spectrum of product 4A.**

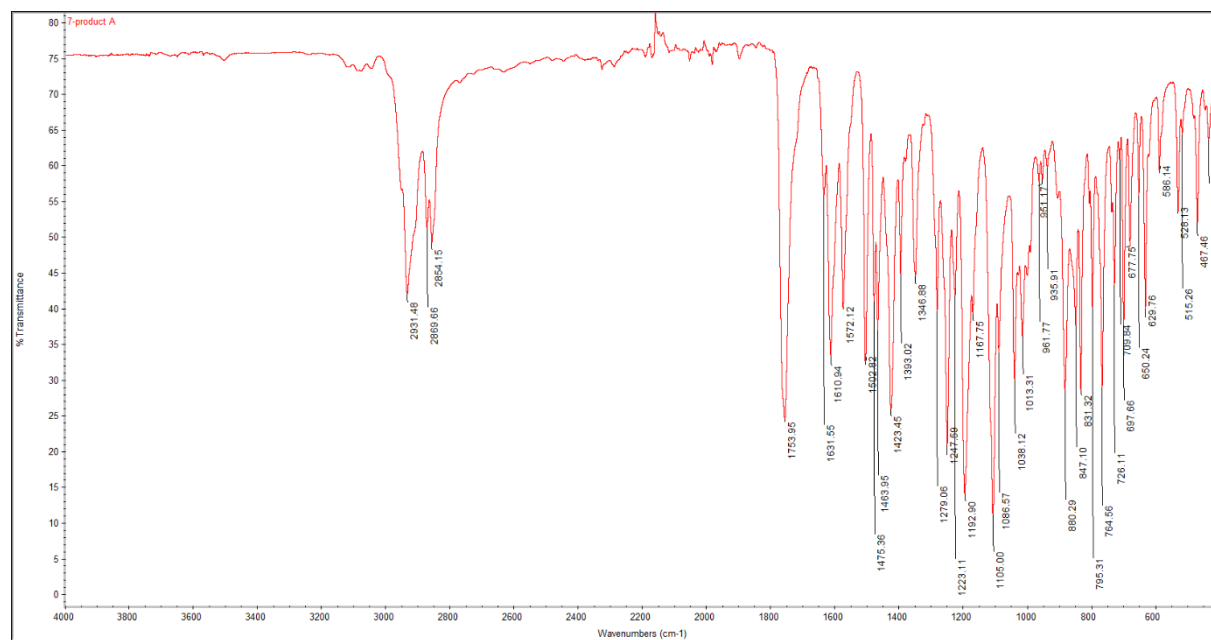

**Figure S27. FTIR-ATR spectrum of product 4A.**

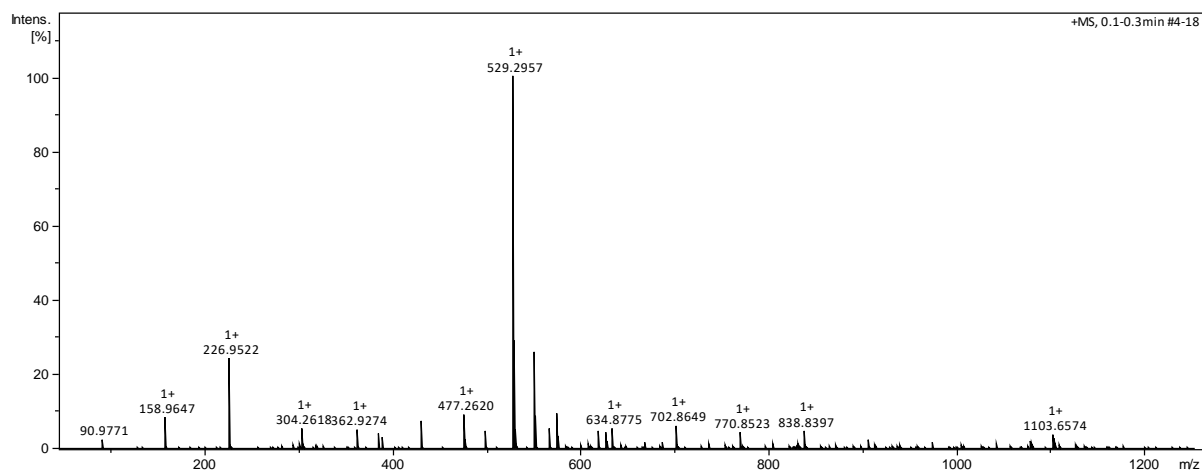

**Figure S28.** HR ESI-MS spectrum of product **4A**.

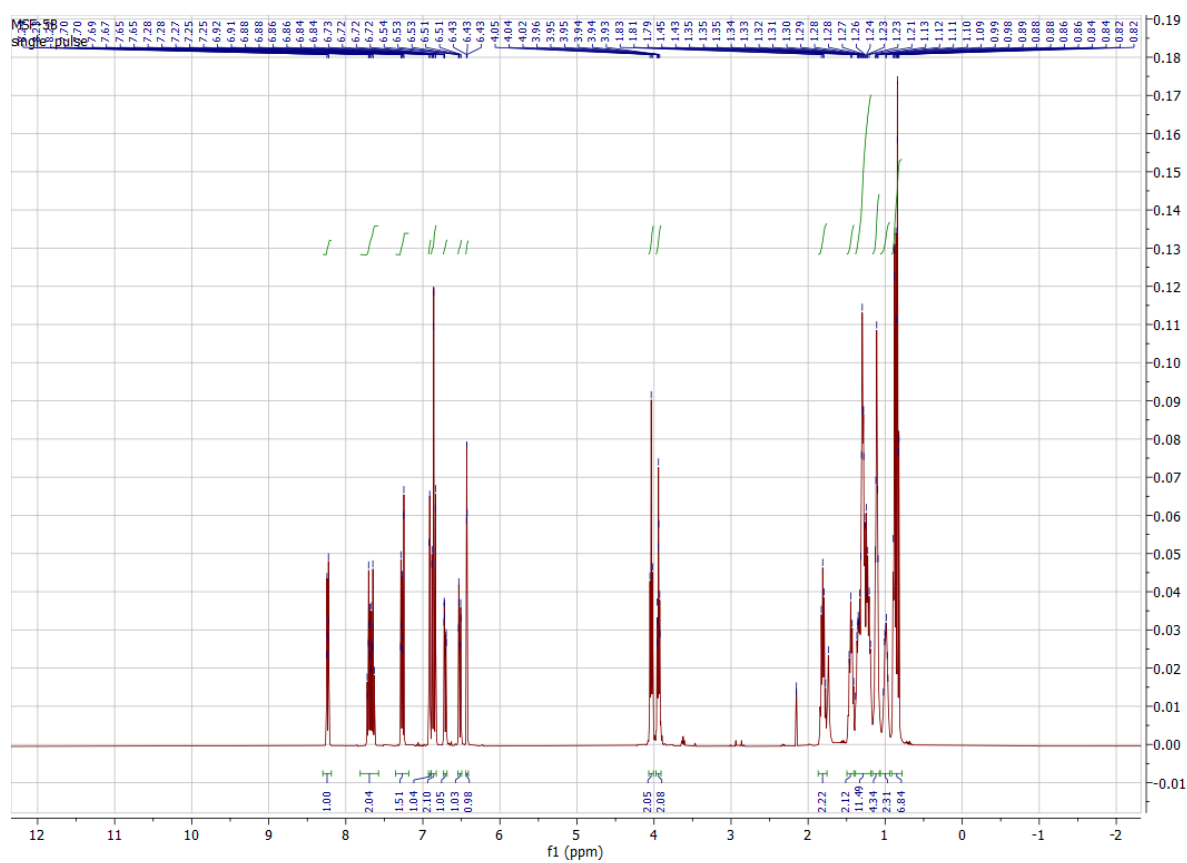

**Figure S29.** <sup>1</sup>H-NMR (600 MHz, chloroform-*d*) spectrum of product **4B**.

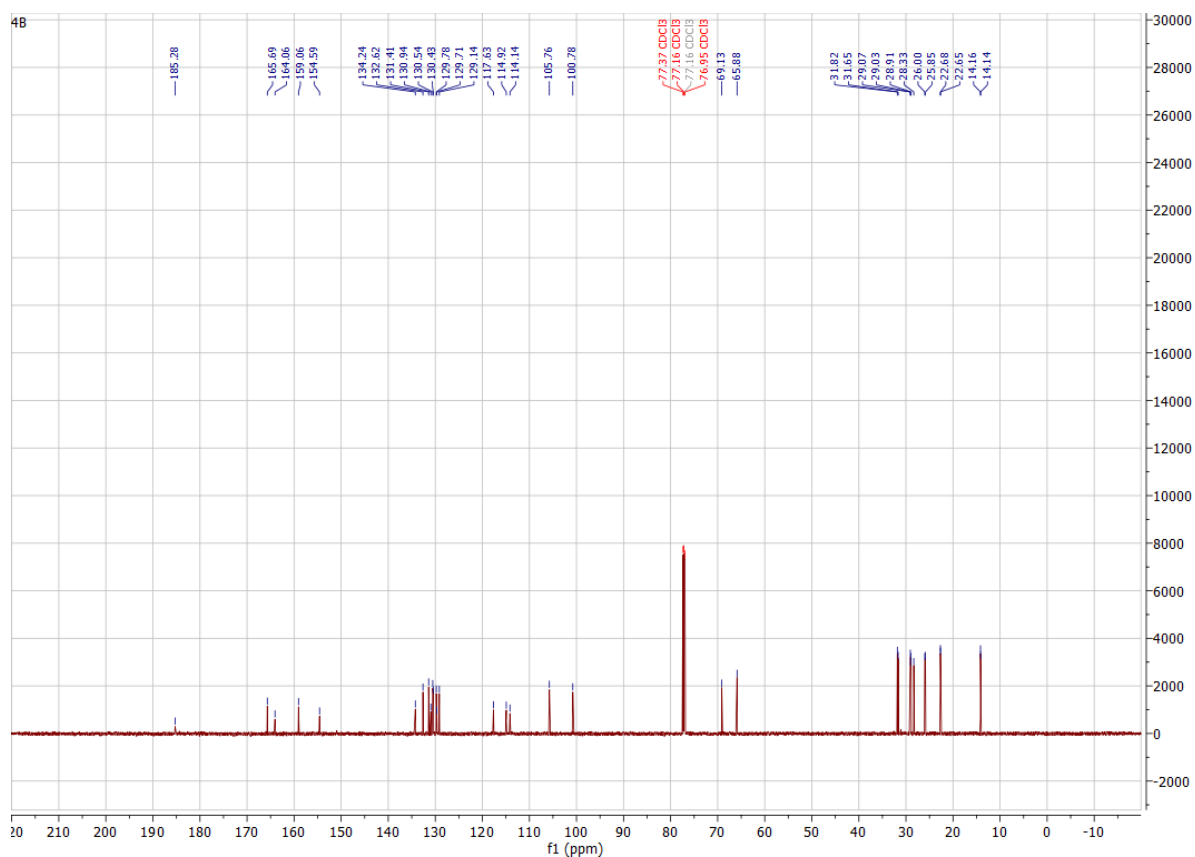

**Figure S30.**  $^{13}\text{C}$ -NMR (151 MHz, chloroform-*d*) spectrum of product **4B**.

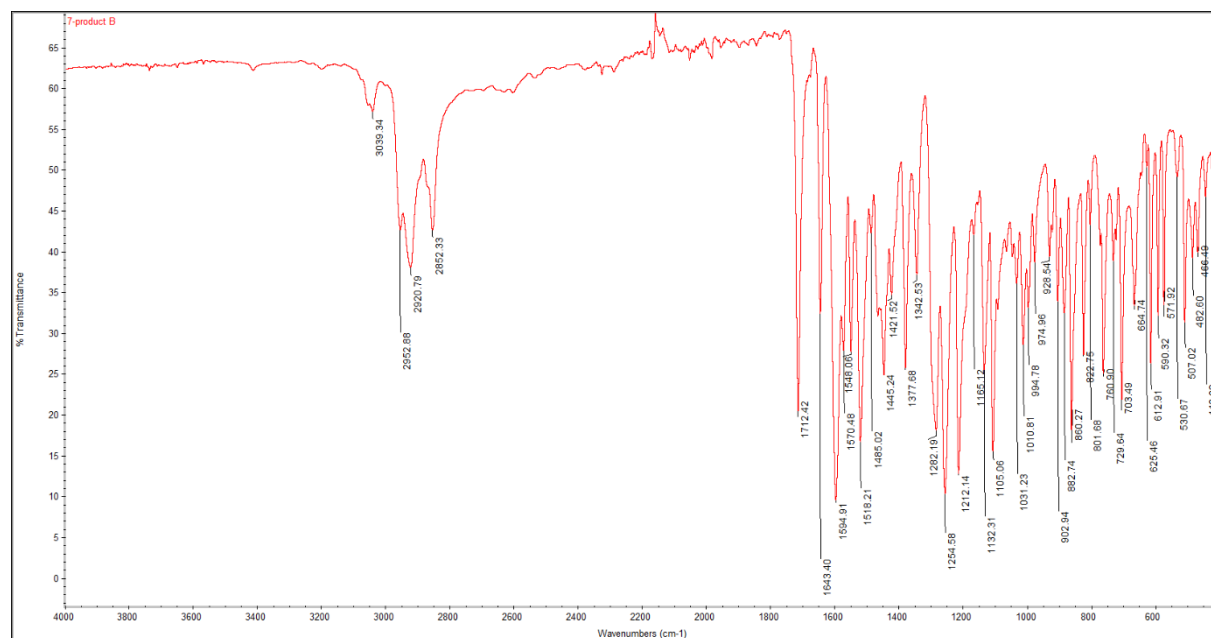

**Figure S31.** FTIR-ATR spectrum of product **4B**.



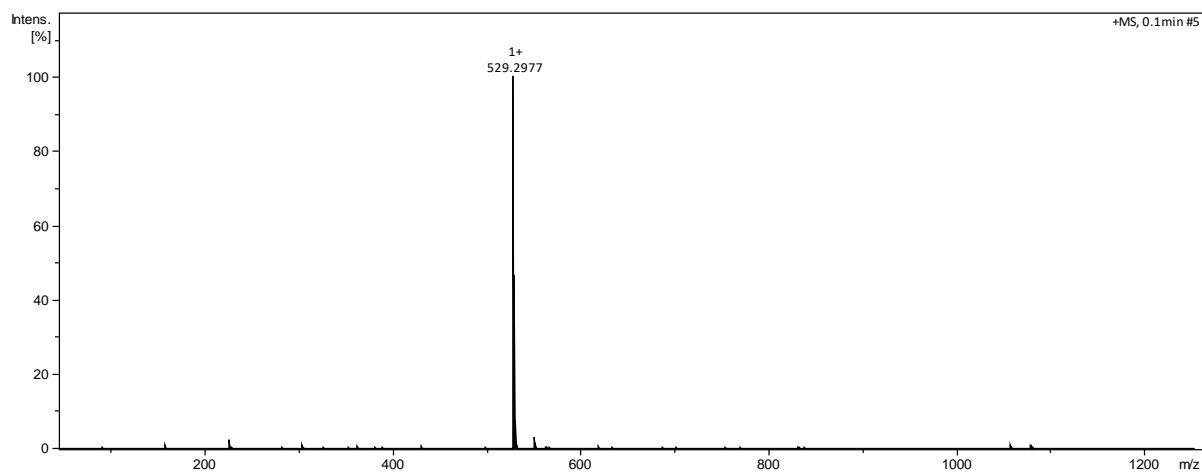

**Figure S32.** HR ESI-MS spectrum of product **4B**.

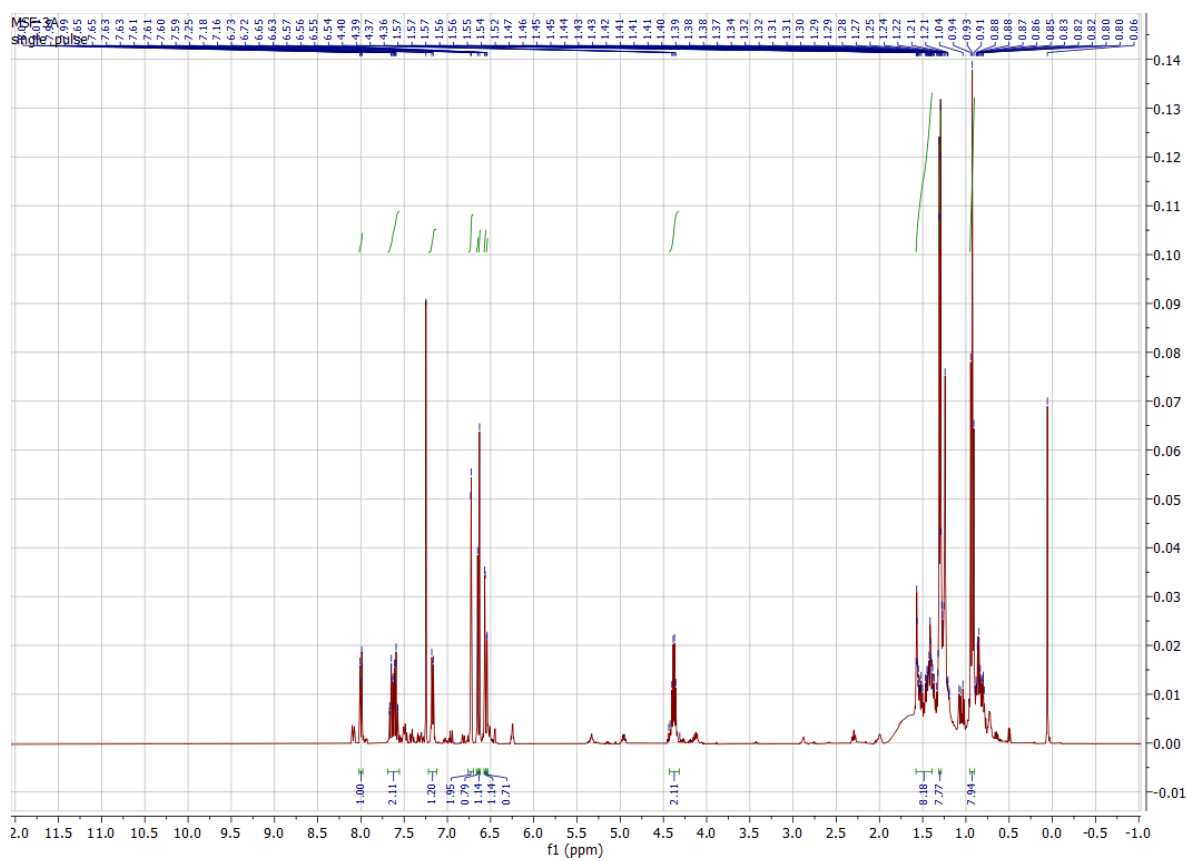

**Figure S33.**  $^1\text{H}$ -NMR (600 MHz, chloroform- $d$ ) spectrum of product **5A**.

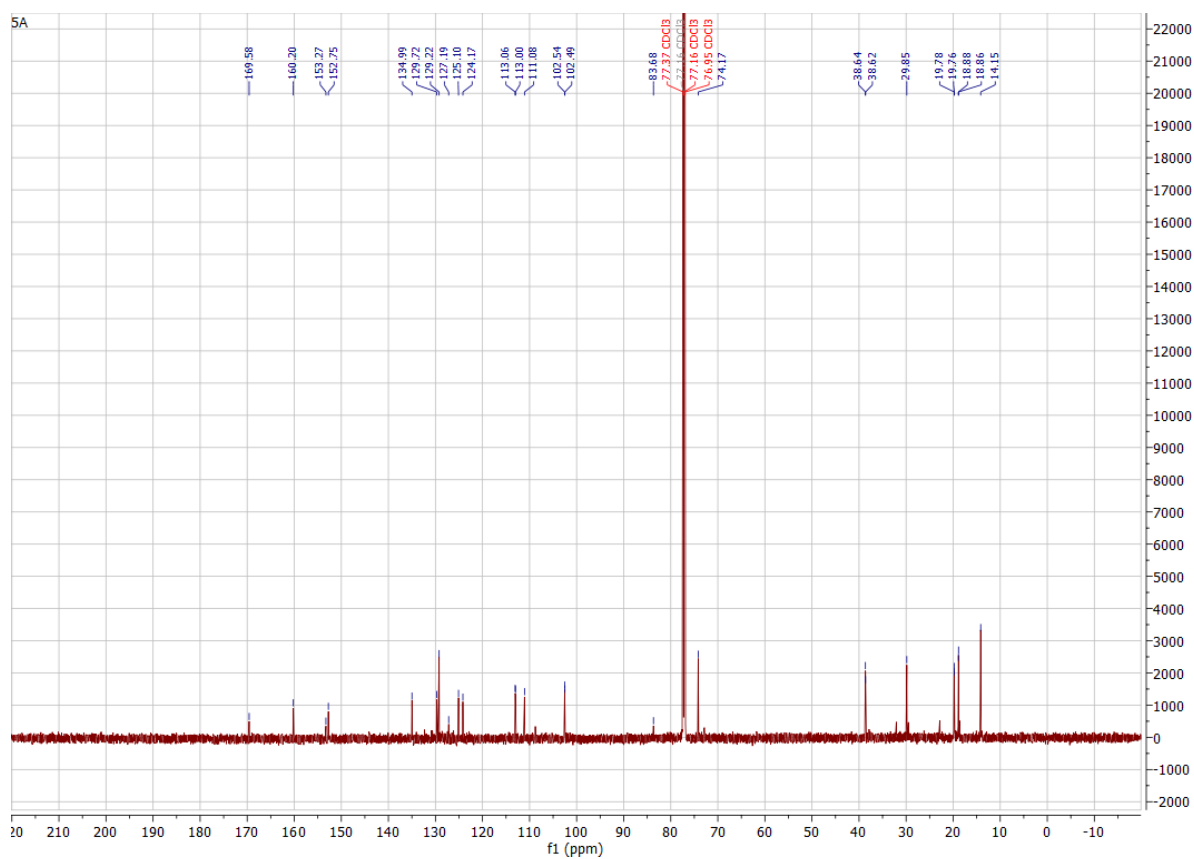

**Figure S34.**  $^{13}\text{C}$ -NMR (151 MHz, chloroform-*d*) spectrum of product 5A.

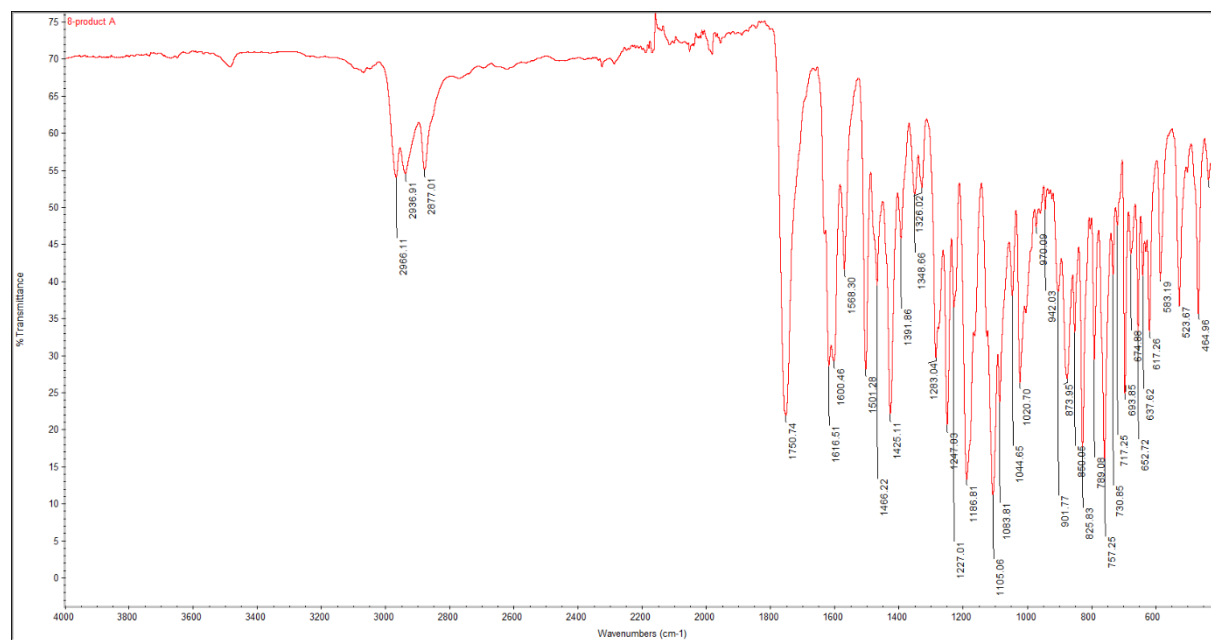

**Figure S35.** FTIR-ATR spectrum of product 5A.

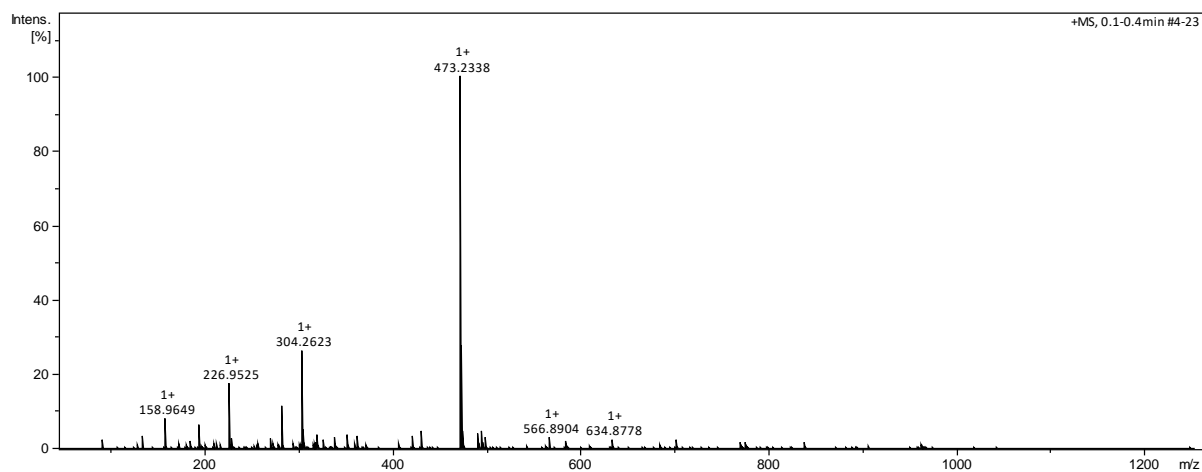

**Figure S36.** HR ESI-MS spectrum of product 5A.

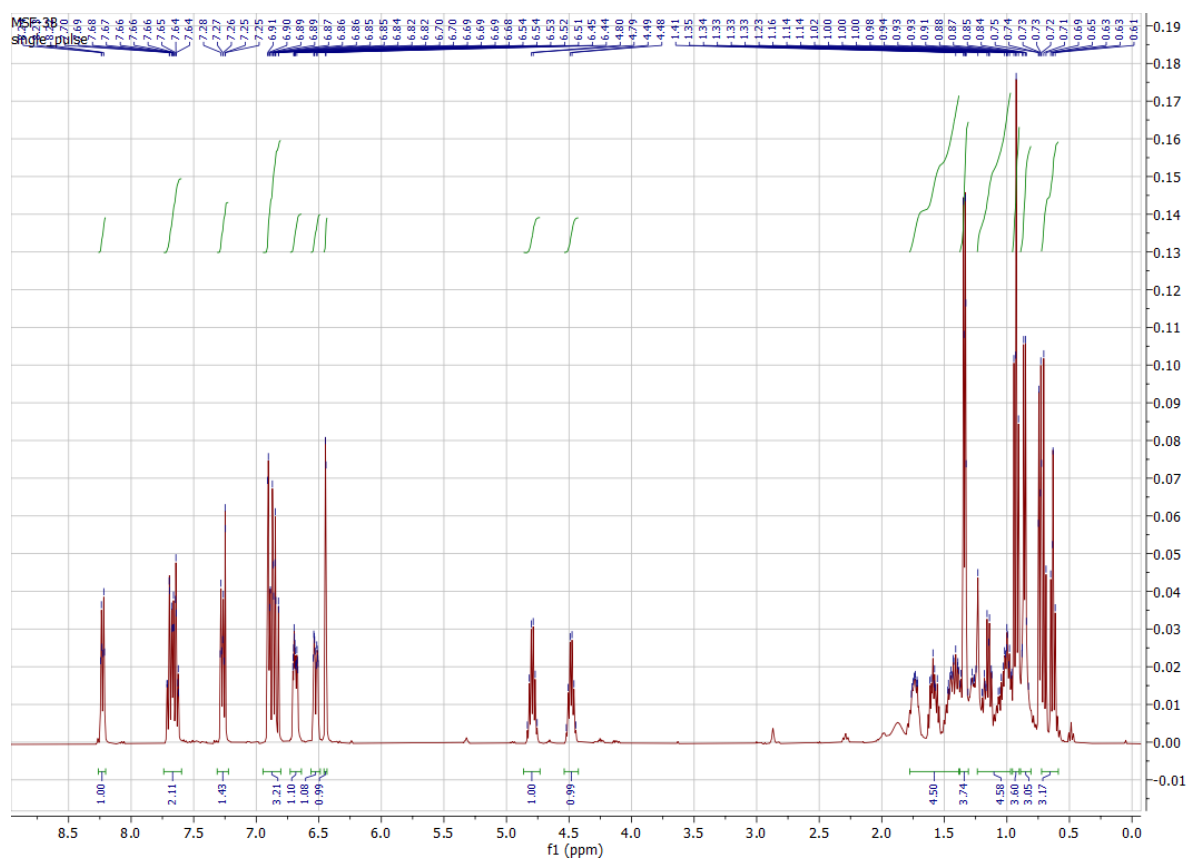

**Figure S37.** <sup>1</sup>H-NMR (600 MHz, chloroform-*d*) spectrum of product 5B.

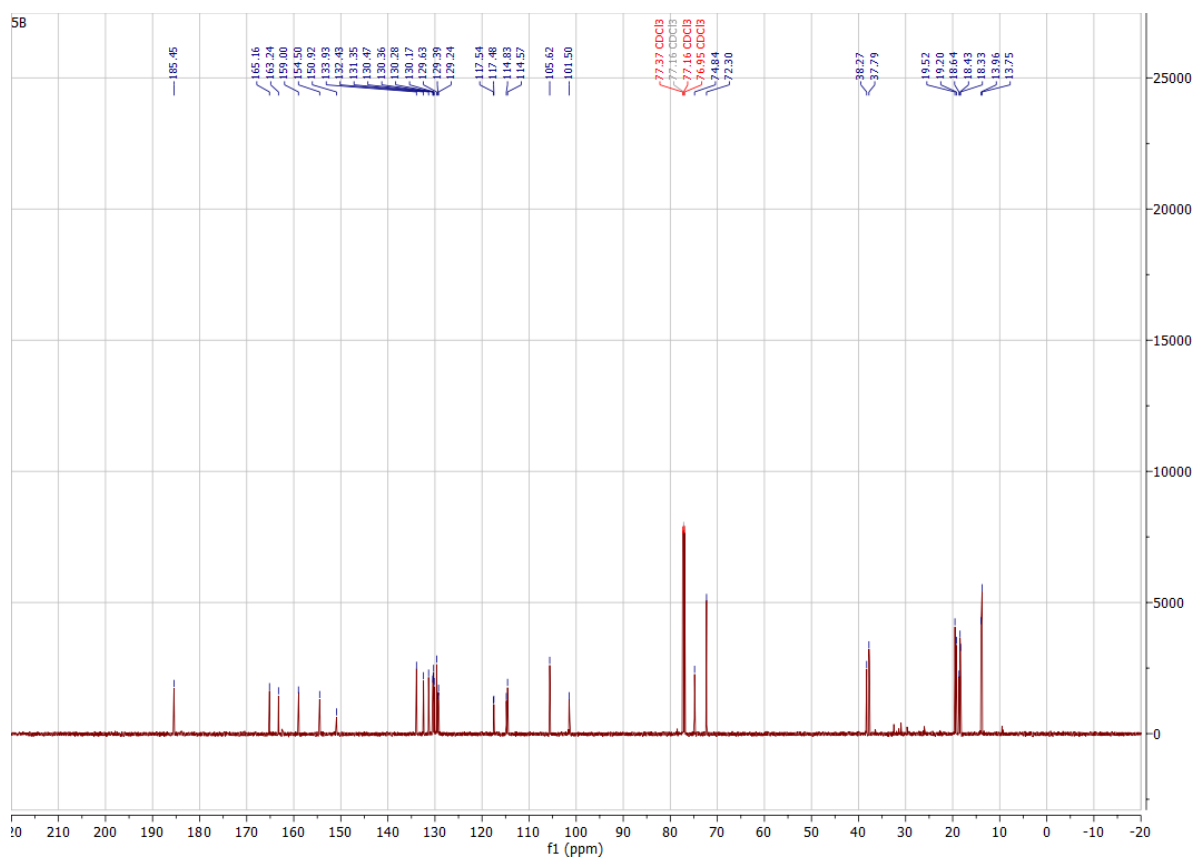

**Figure S38.**  $^{13}\text{C}$ -NMR (151 MHz, chloroform-*d*) spectrum of product **5B**.

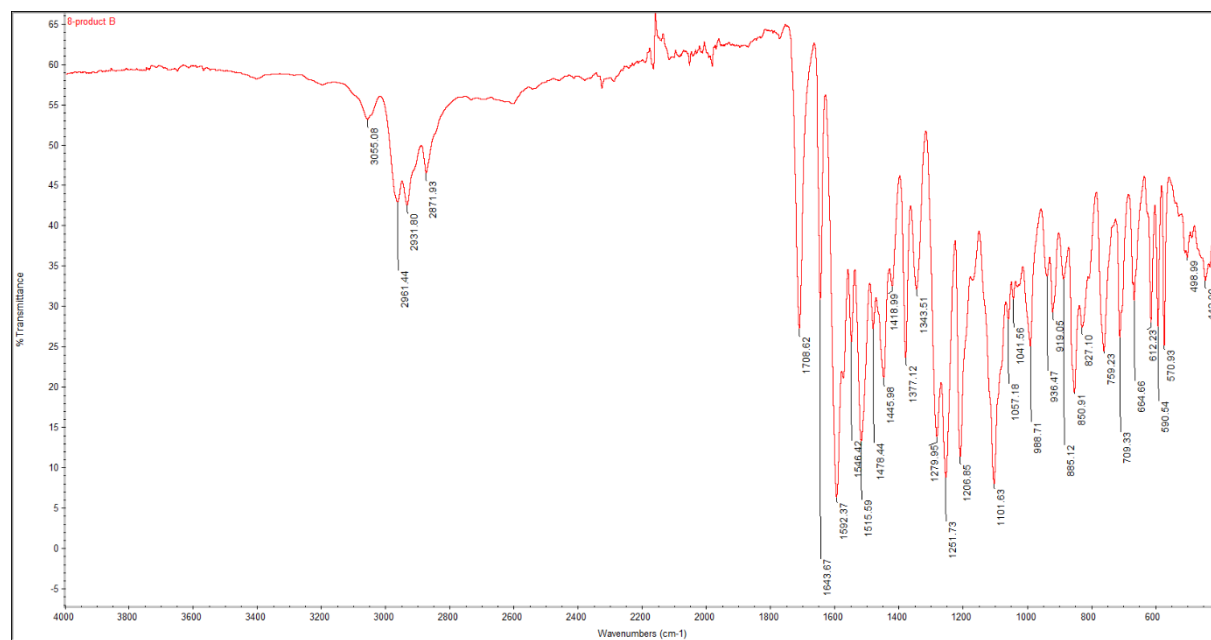

**Figure S39.** FTIR-ATR spectrum of product **5B**.

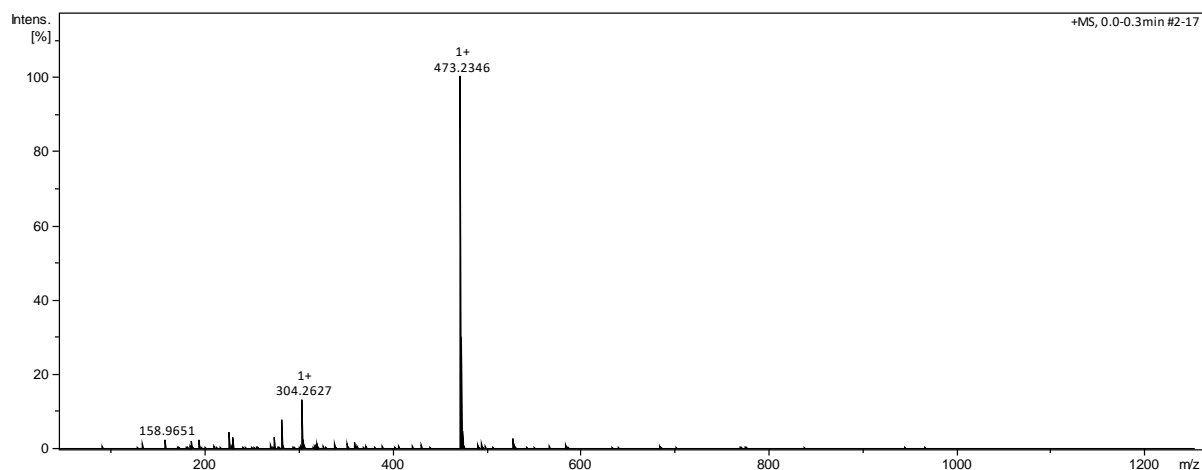

**Figure S40.** HR ESI-MS spectrum of product **5B**.

## S2. Spectroscopic properties

**Table S1.** Summary of spectroscopic properties measured for all compounds.

| Compound                   | $\lambda_{\text{abs}}$ (nm) | $\lambda_{\text{em}}$ (nm) | $\tau$ (ns) | QY (%) |
|----------------------------|-----------------------------|----------------------------|-------------|--------|
| 1A                         | 445                         | 464                        | 4.5         | 20.94  |
| 2A                         | 445                         | 465                        | 5.9         | 12.12  |
| 3A                         | 445                         | 462                        | 5.6         | 26.83  |
| 4A                         | 445                         | 464                        | 5.3         | 32.3   |
| 5A                         | 442                         | 465                        | 5.5         | 29.55  |
| 1B                         | 452 / 475                   | 517                        | 3.3         | 28.90  |
| 2B                         | 453 / 475                   | 515                        | 3.2         | 32.14  |
| 3B                         | 455                         | 518                        | 3.3         | 24.15  |
| 4B                         | 455                         | 520 / 556                  | 3.1         | 36.56  |
| 5B                         | 454 / 480                   | 518                        | 3.2         | 27.65  |
| Parent dye – cationic form | 437                         | 475                        | 3.5–4.4     | 90-100 |
| Parent dye – neutral form  | 453; 474                    | 517                        | 2.97        | 29     |

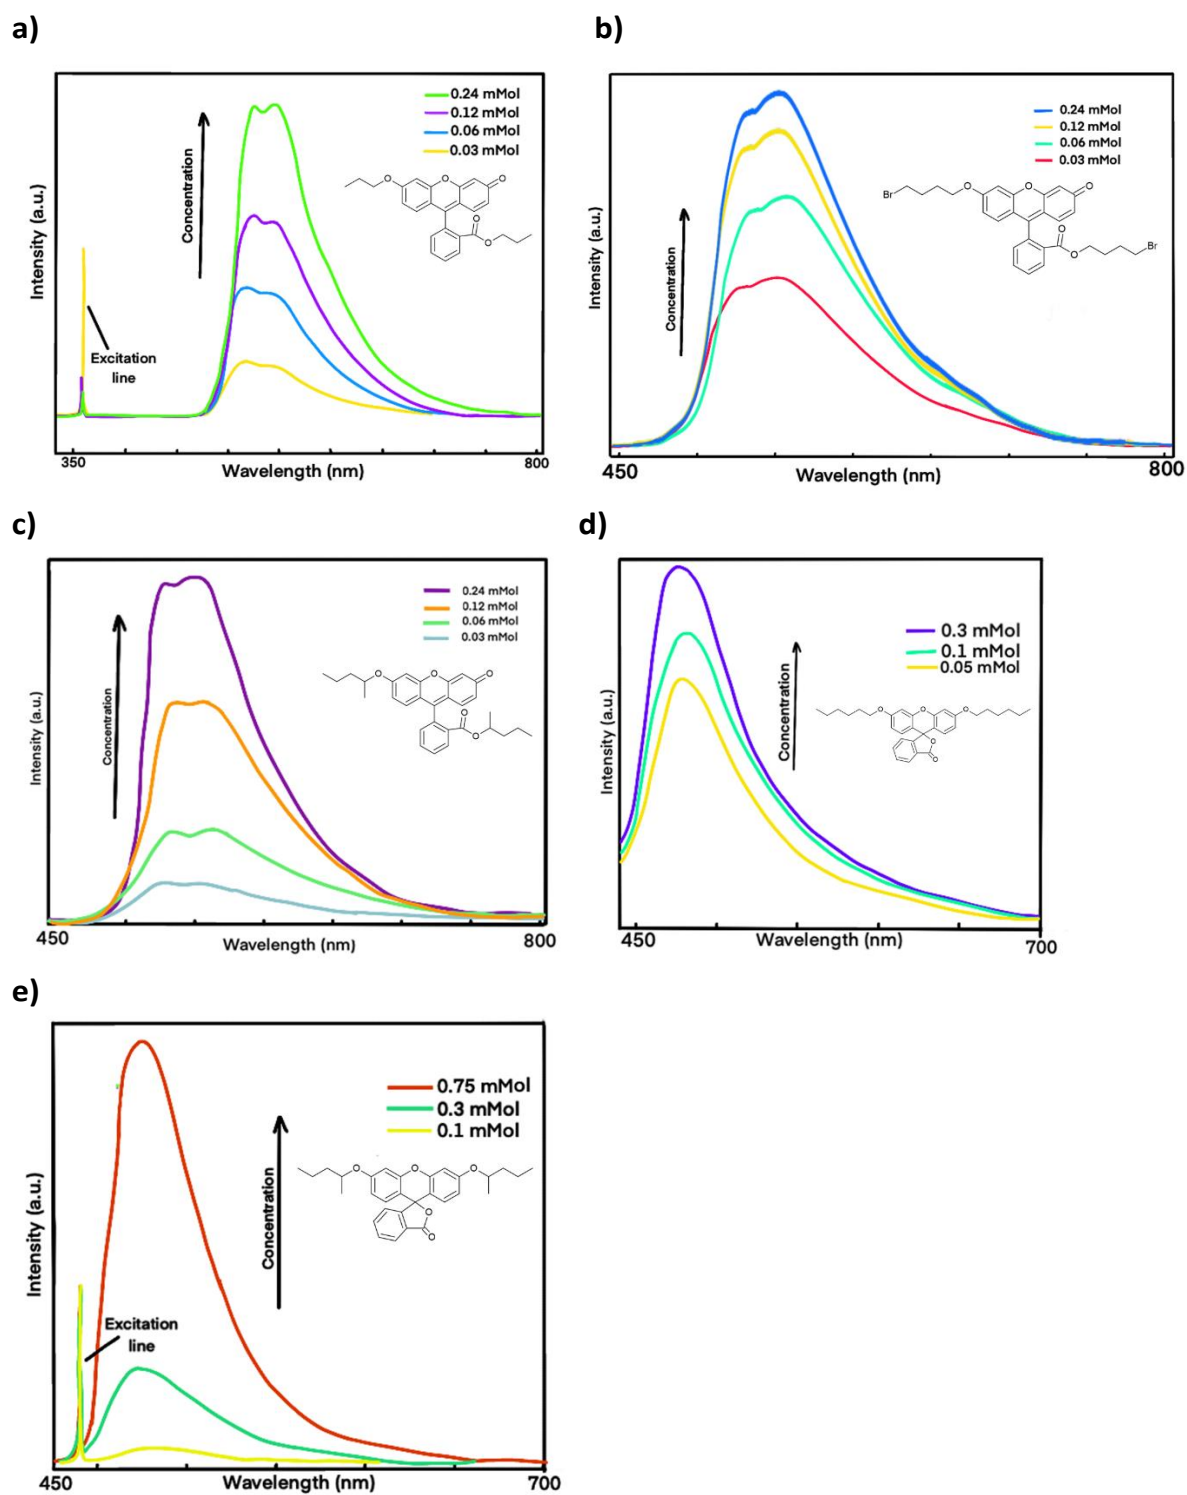

**Figure S41.** Emission spectra for different concentration measured for synthesized compounds (a) **1B**, (b) **2B**, (c) **5B**, (d) **3A**, (e) **5A**.
